# Supplementary material for: Diastereoselective synthesis of spiro-cyclopropanyl-cyclohexadienones via direct sulfide-catalyzed [2 + 1] annulation of para-quinone methides with bromides
Source: Royal Society of Chemistry journal article supplement (doi:10.1039/d0ob00778a), 2020-01-01

**Electronic Supplementary Information**

**Diastereoselective Synthesis of Spiro-Cyclopropanyl-  
Cyclohexadienones *via* Direct Sulfide-Catalyzed [2 +  
1] Annulation of *para*-Quinone Methides with  
Bromides**

Yingpeng Su,\* Yanan Zhao, Bingbing Chang, Qinqin Ling, Yawei Feng, Xiaolong  
Zhao, Danfeng Huang, Ke-Hu Wang, Congde Huo,\* and Yulai Hu\*

College of Chemistry and Chemical Engineering, Northwest Normal University, 967  
Anning East Road, Lanzhou 730070, P. R. China

\* E-mail: [suyp51@nwnu.edu.cn](mailto:suyp51@nwnu.edu.cn);

## Table of Contents

|                                                 |     |
|-------------------------------------------------|-----|
| 1. NMR copies of compounds <b>4a-4y</b> . ..... | S3  |
| 2. NMR copies of compounds <b>6a-6n</b> . ..... | S30 |

# 1. NMR copies of compounds 4a-4y.

NMR copies of compound **4a**:

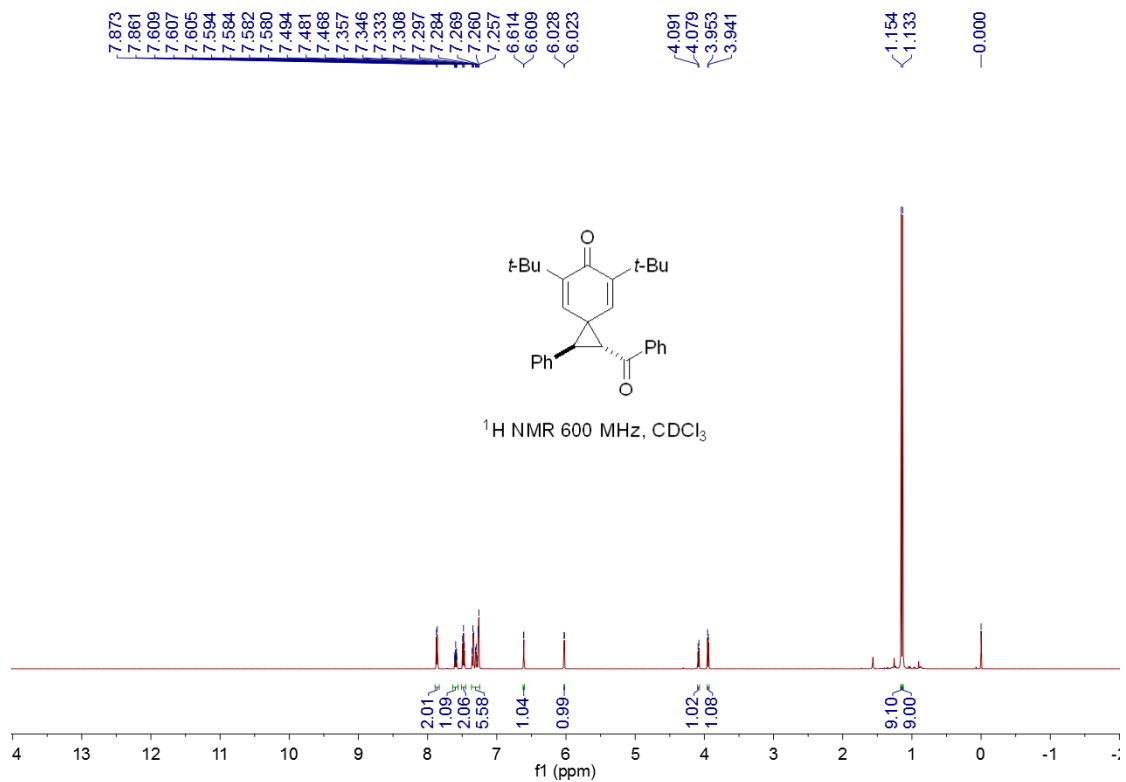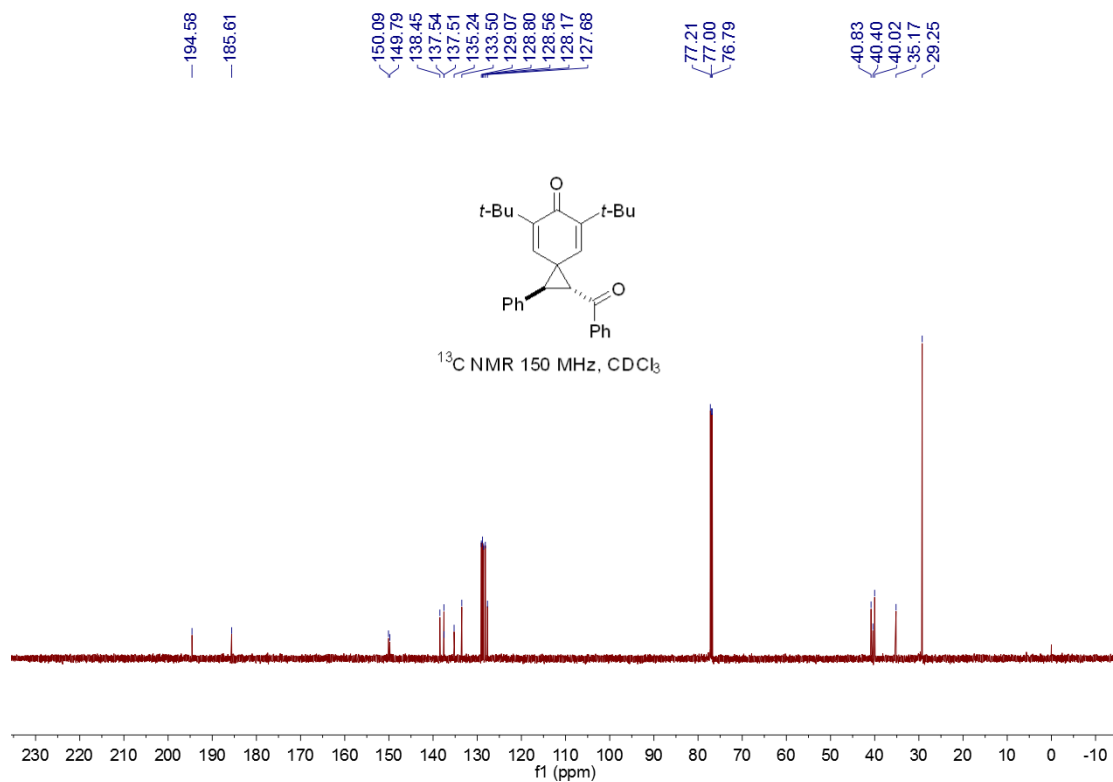

NMR copies of compound **4b**:

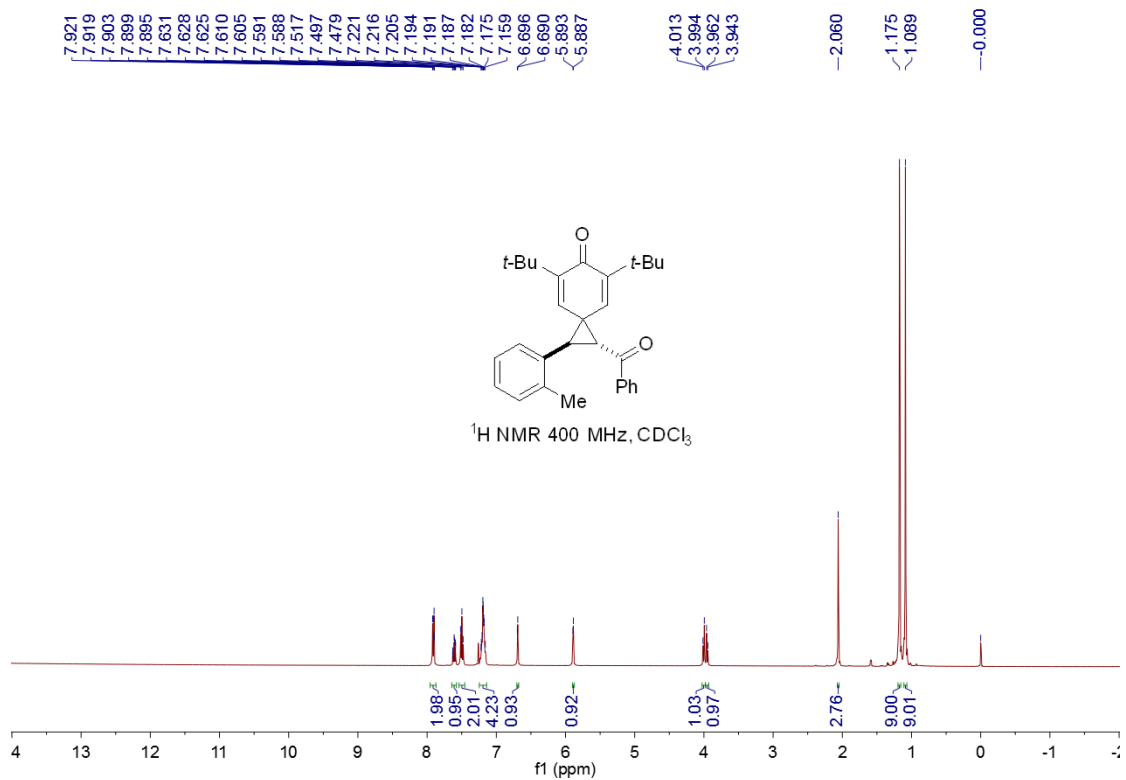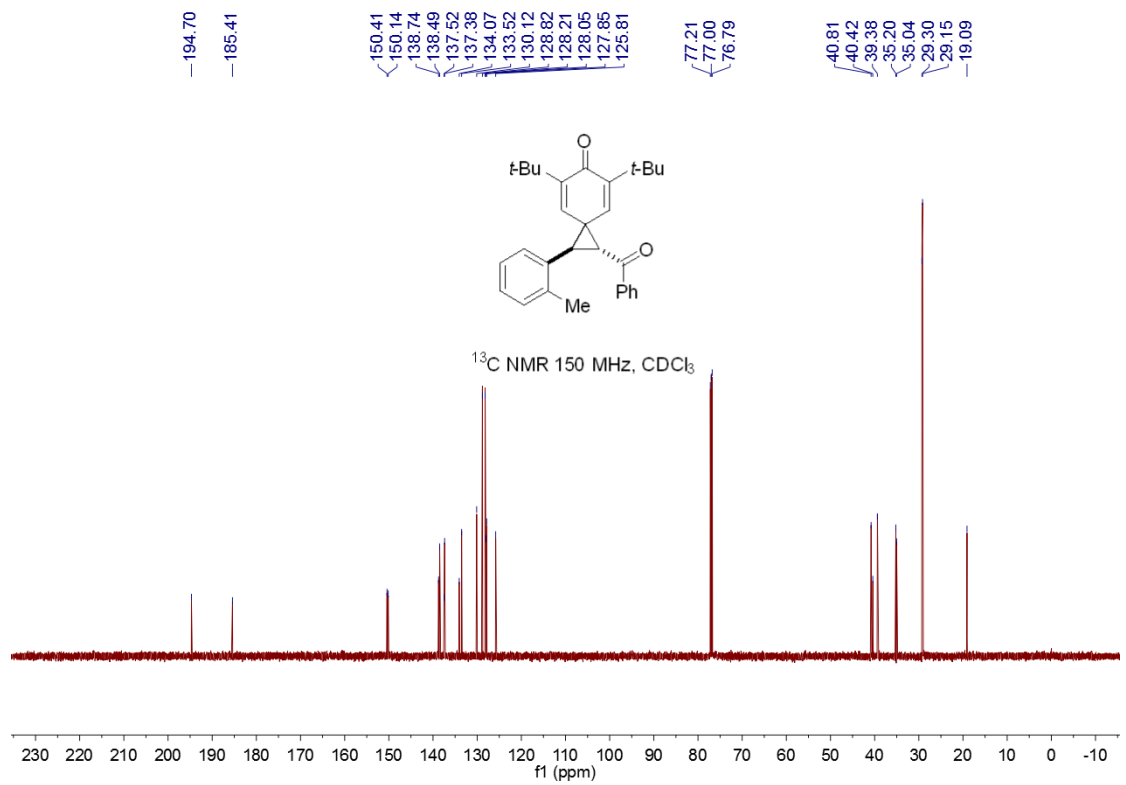

NMR copies of compound **4c**:

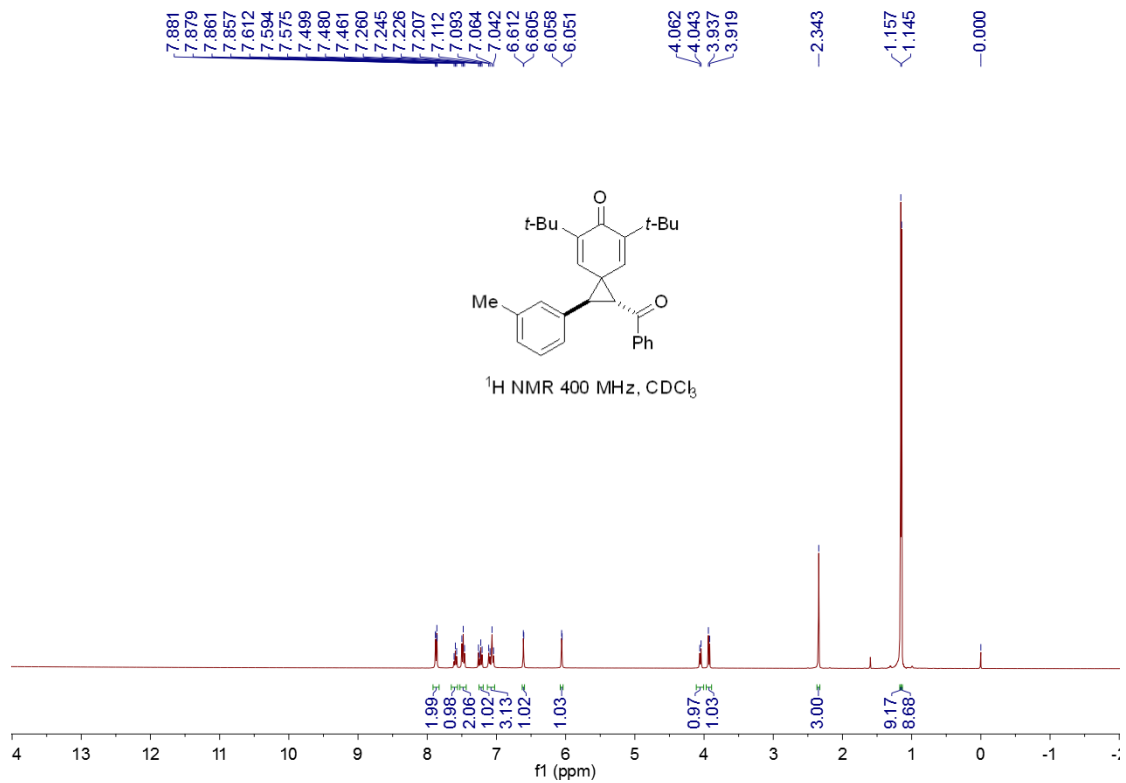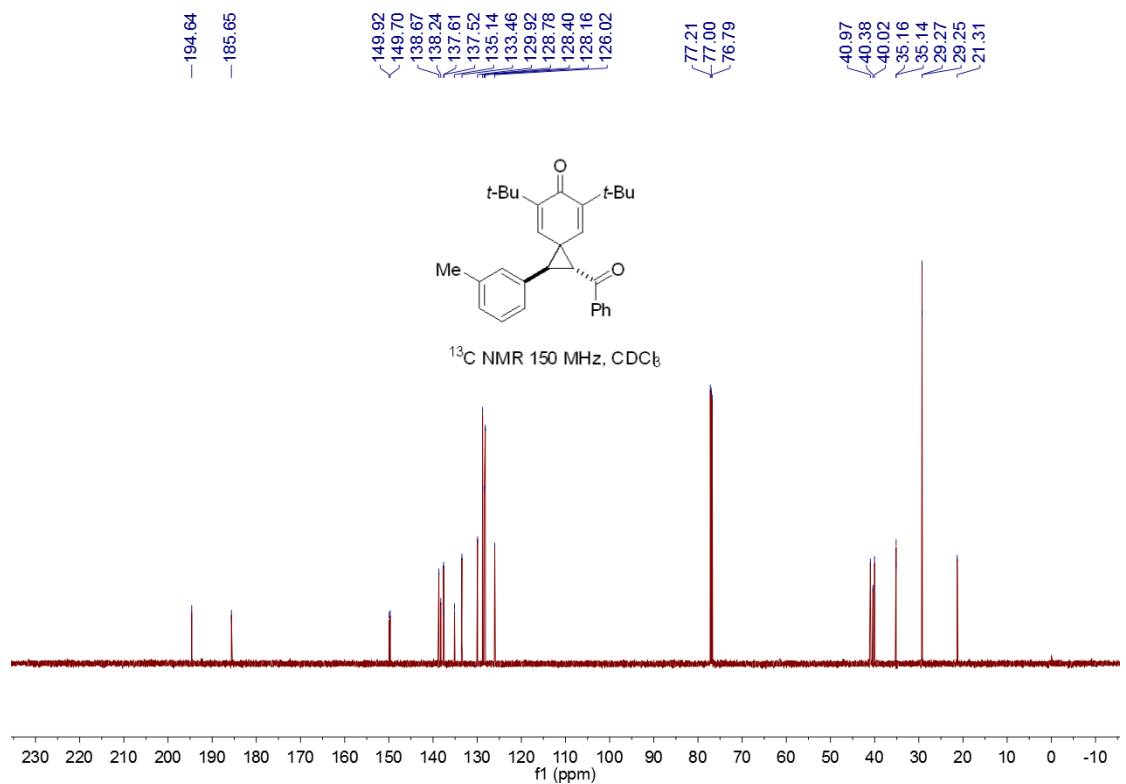

NMR copies of compound **4d**:

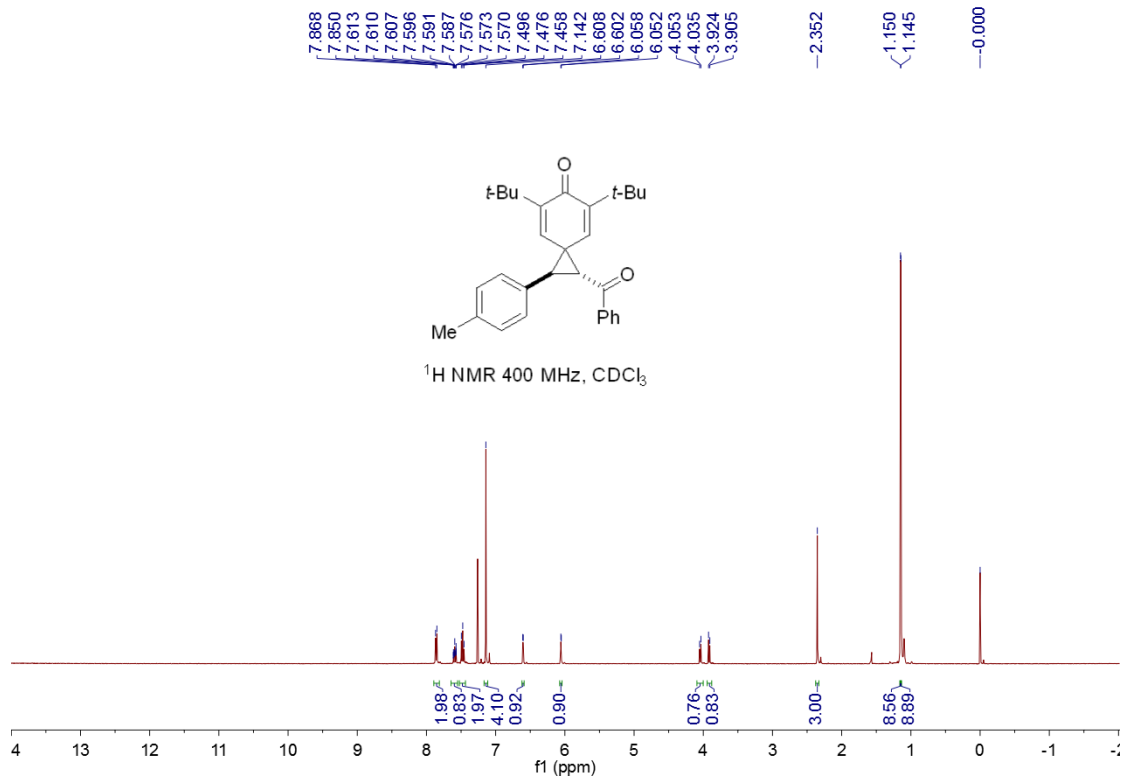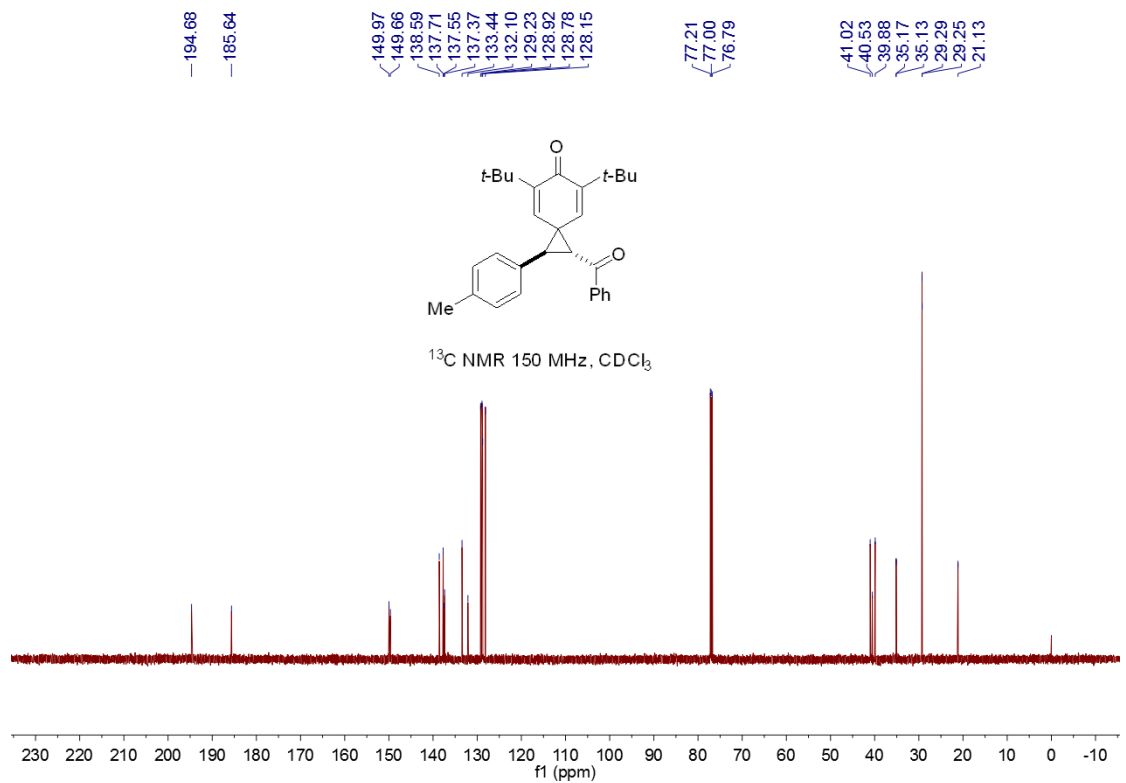

NMR copies of compound **4e**:

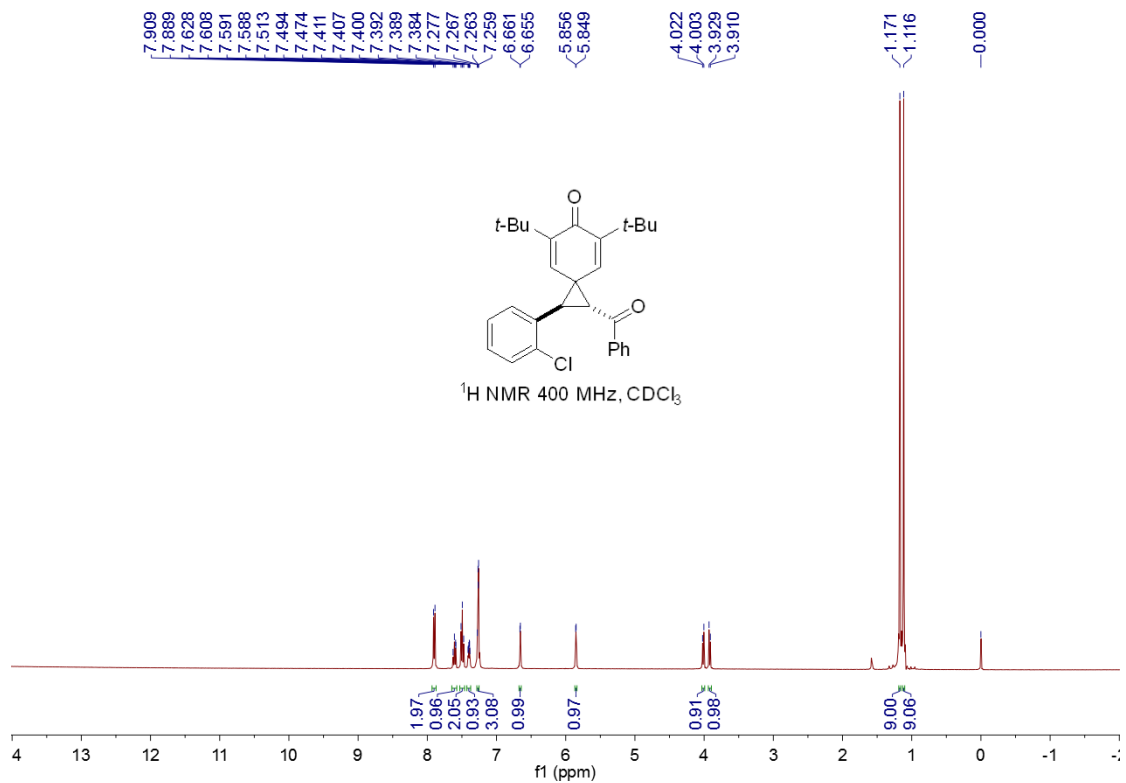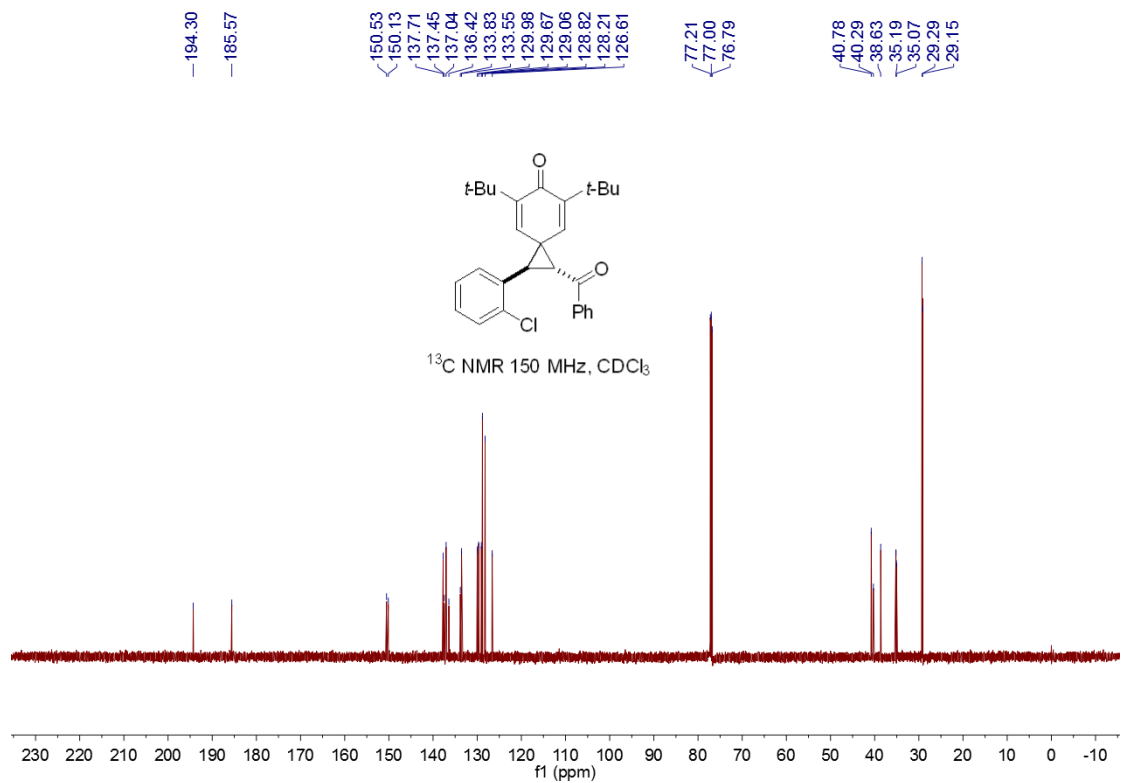

NMR copies of compound **4f**:

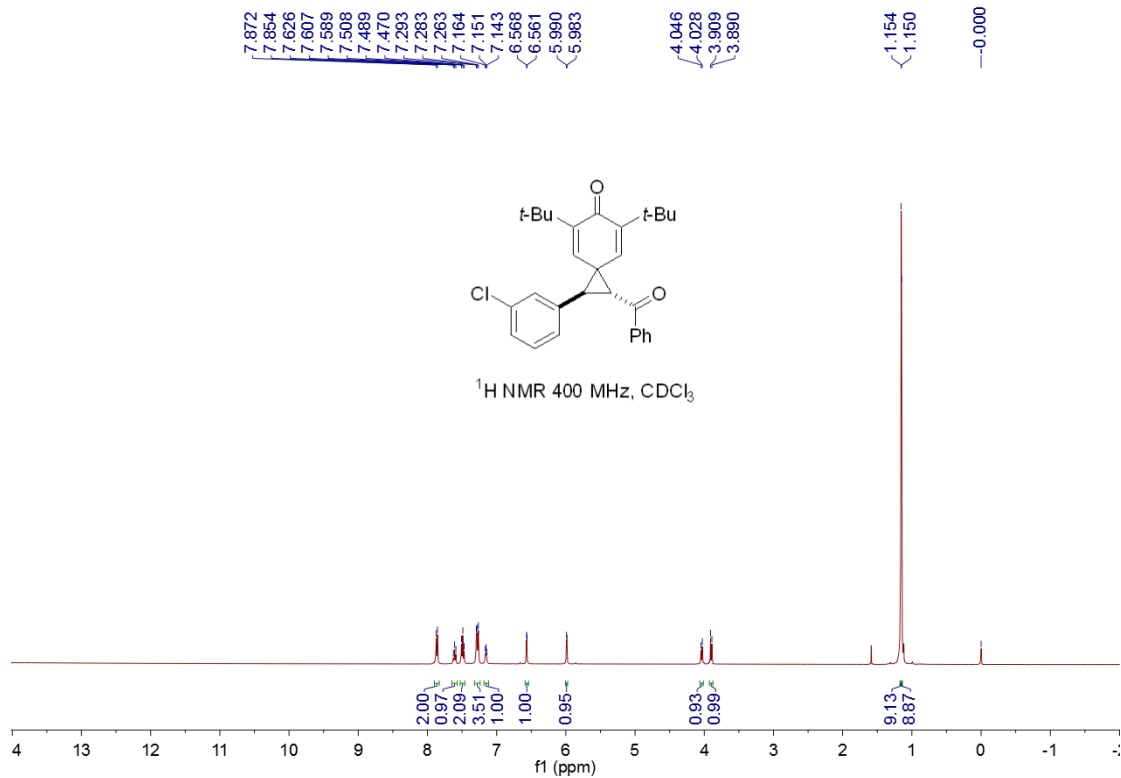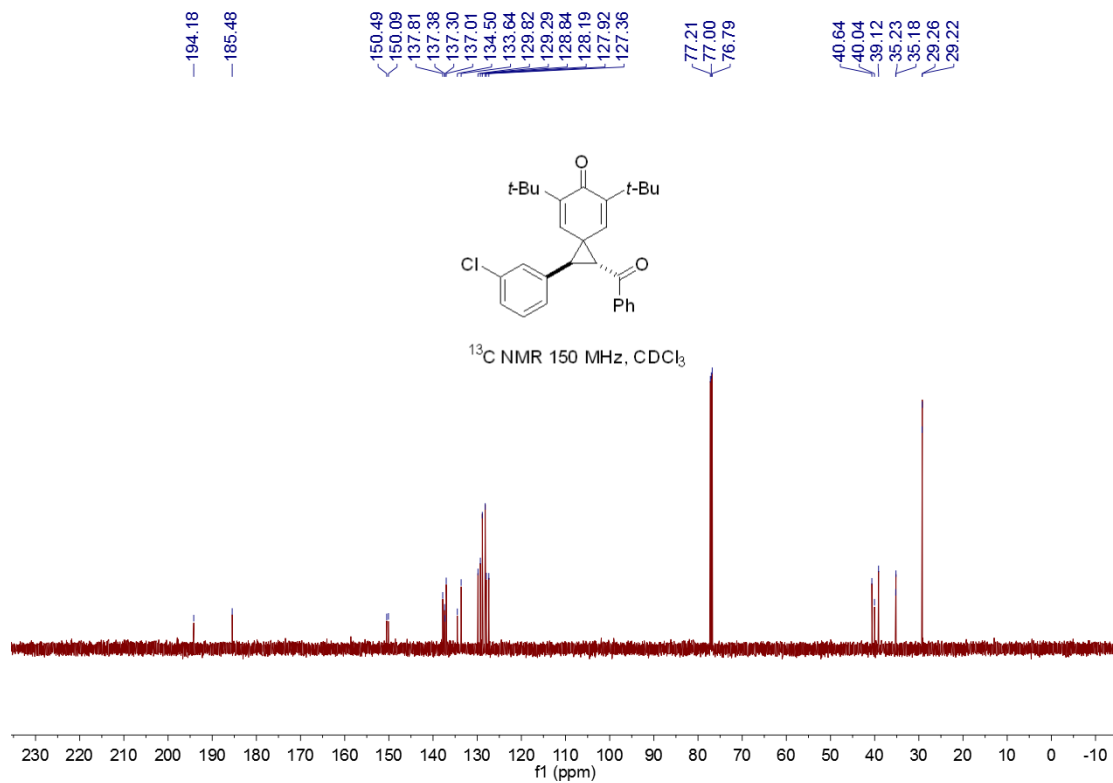



NMR copies of compound **4g**:

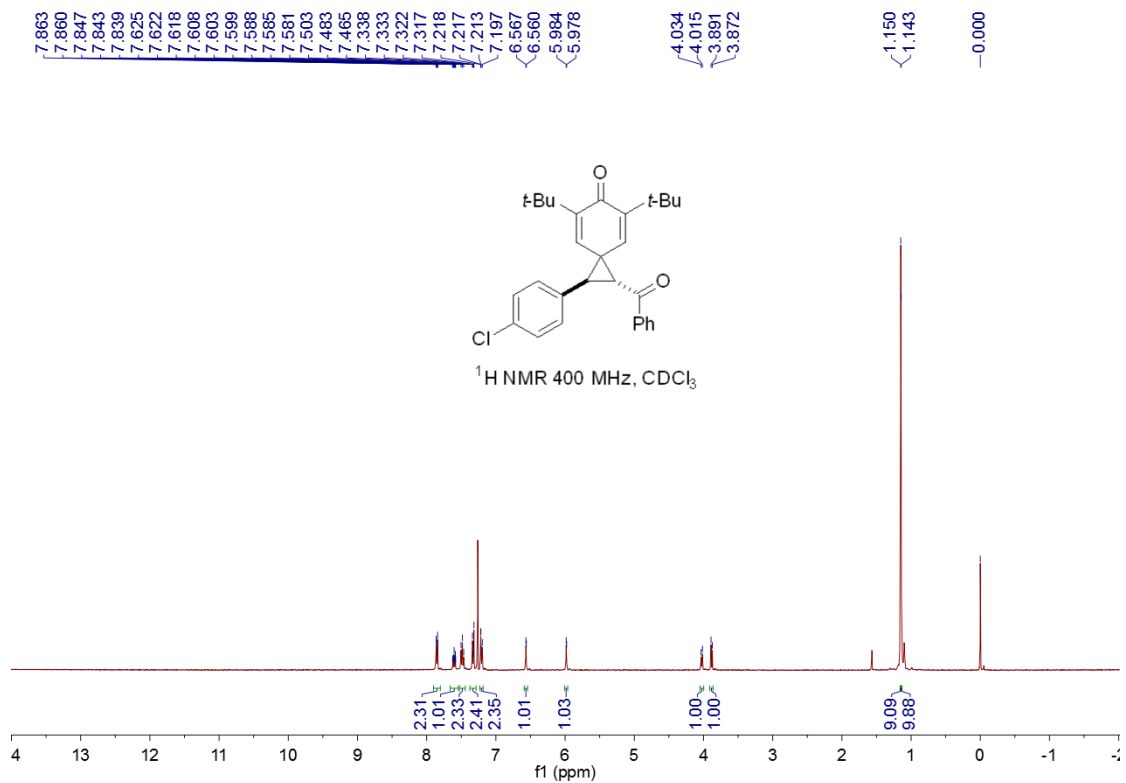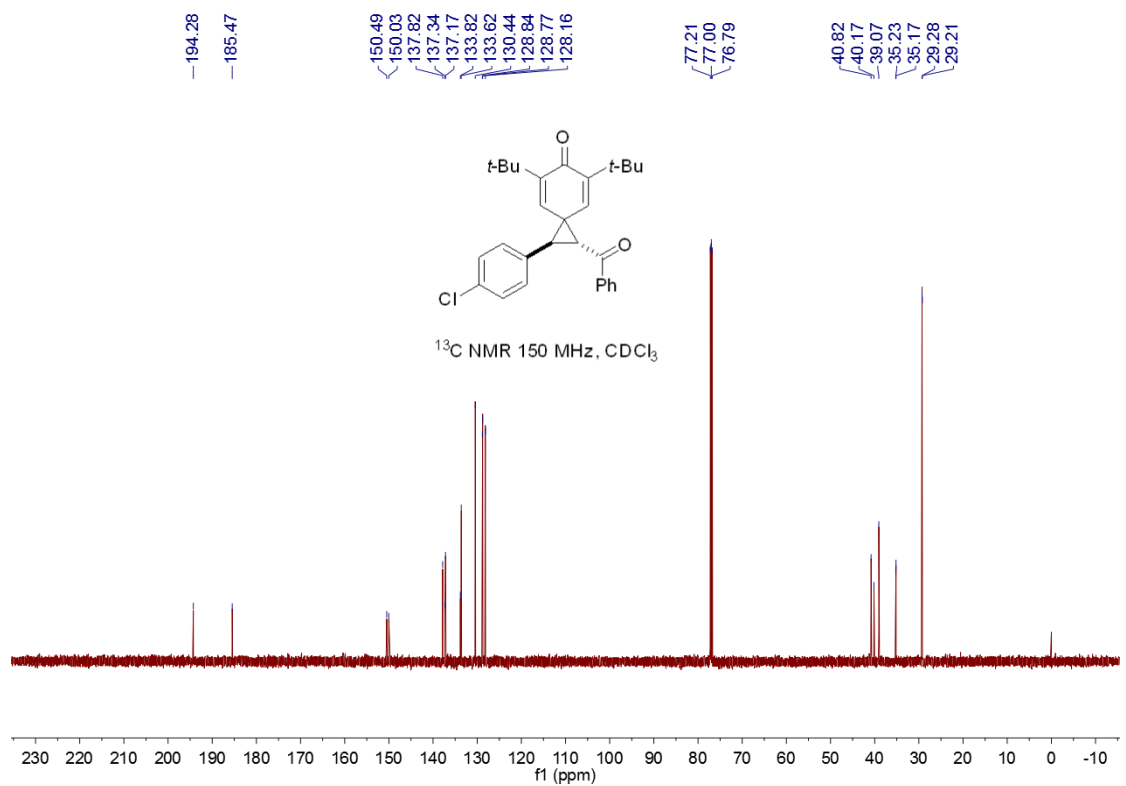

NMR copies of compound **4h**:

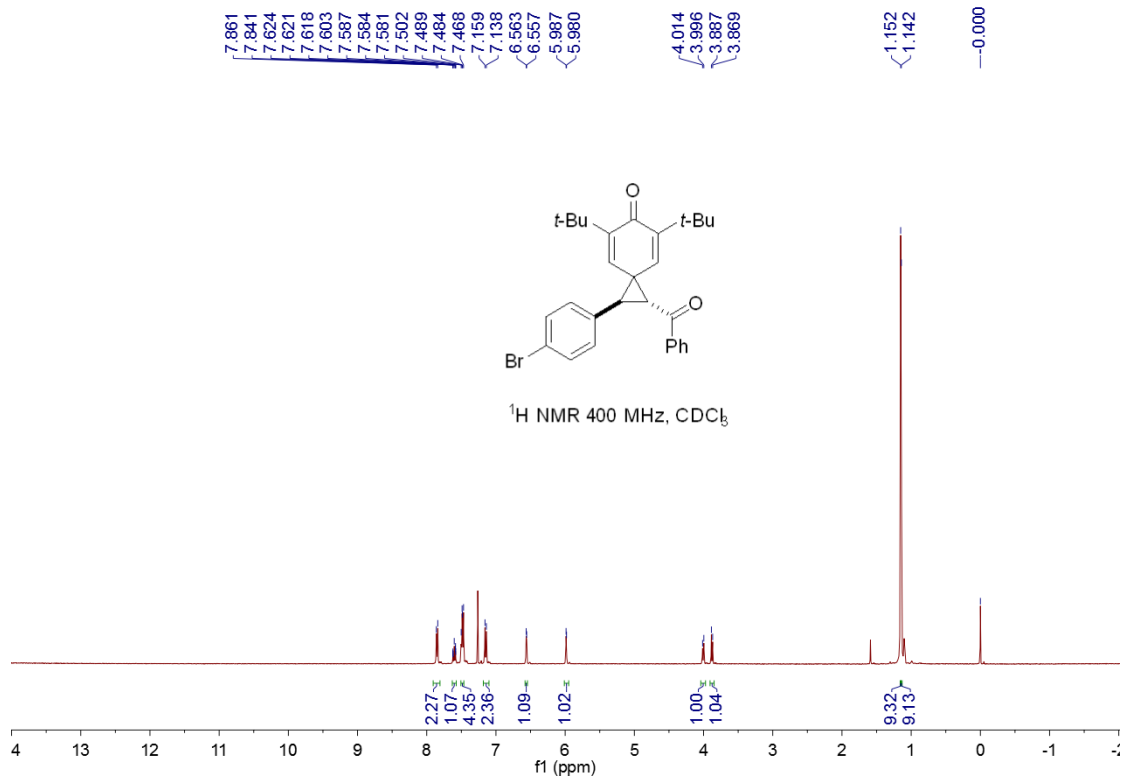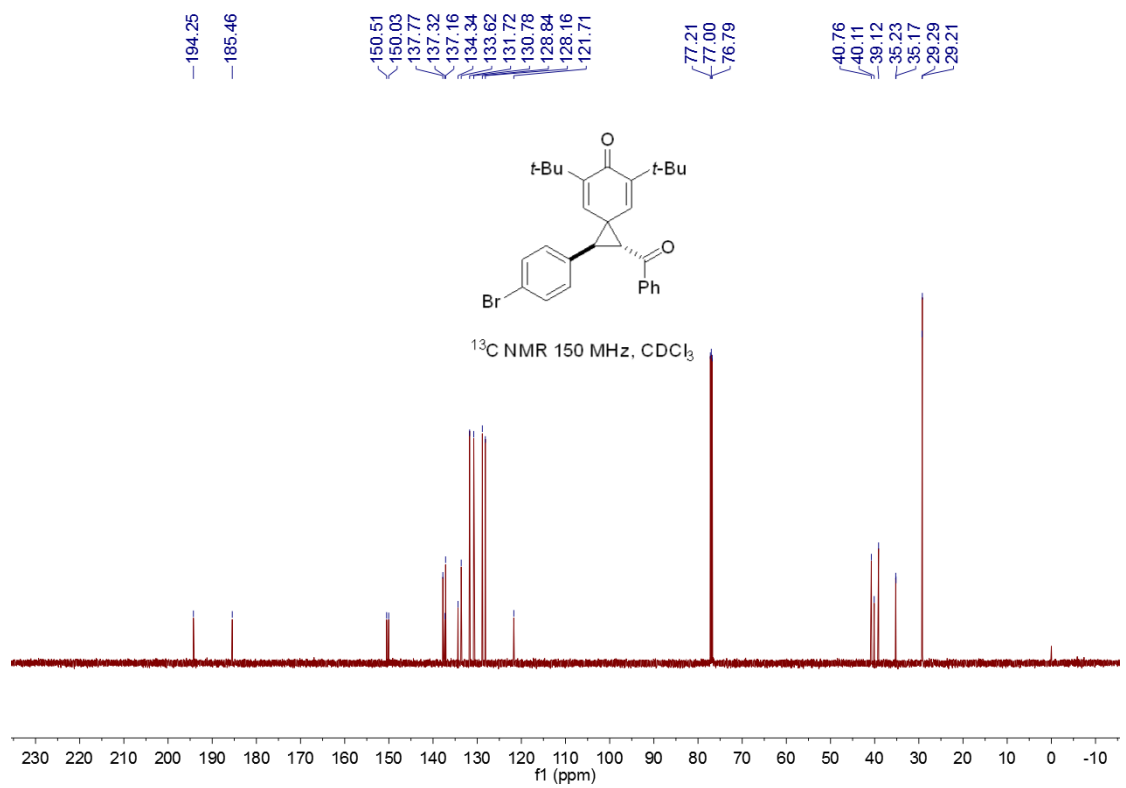

NMR copies of compound **4i**:

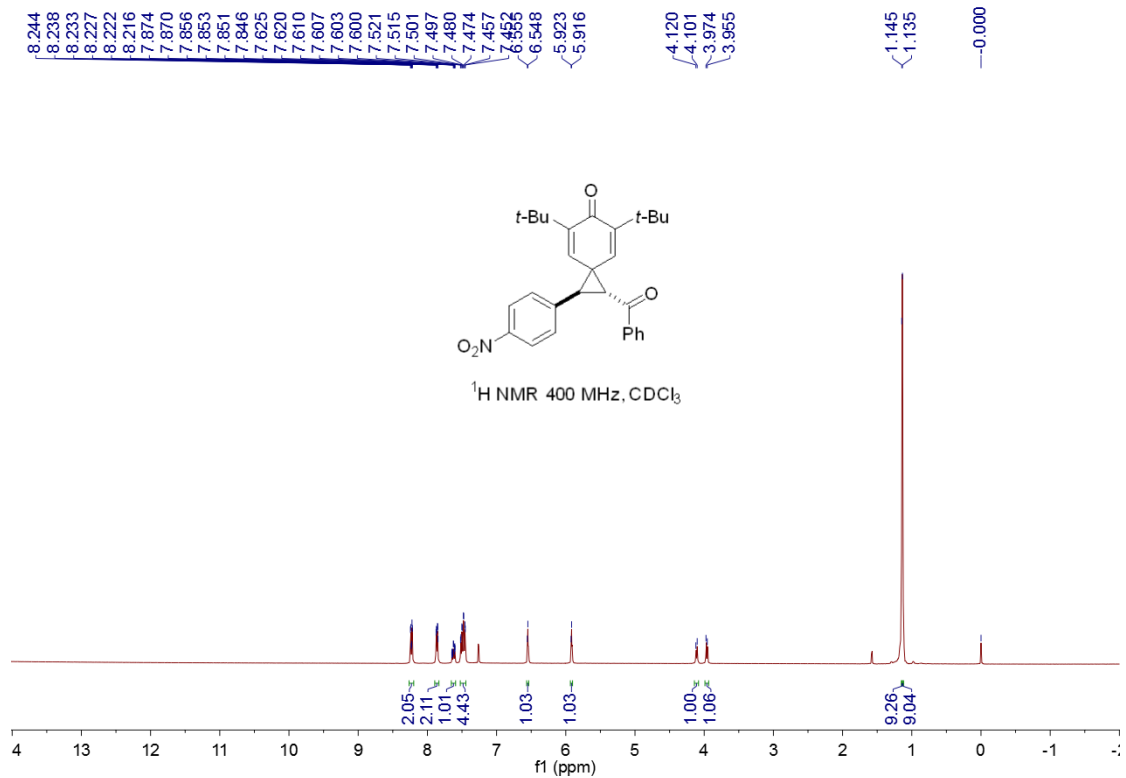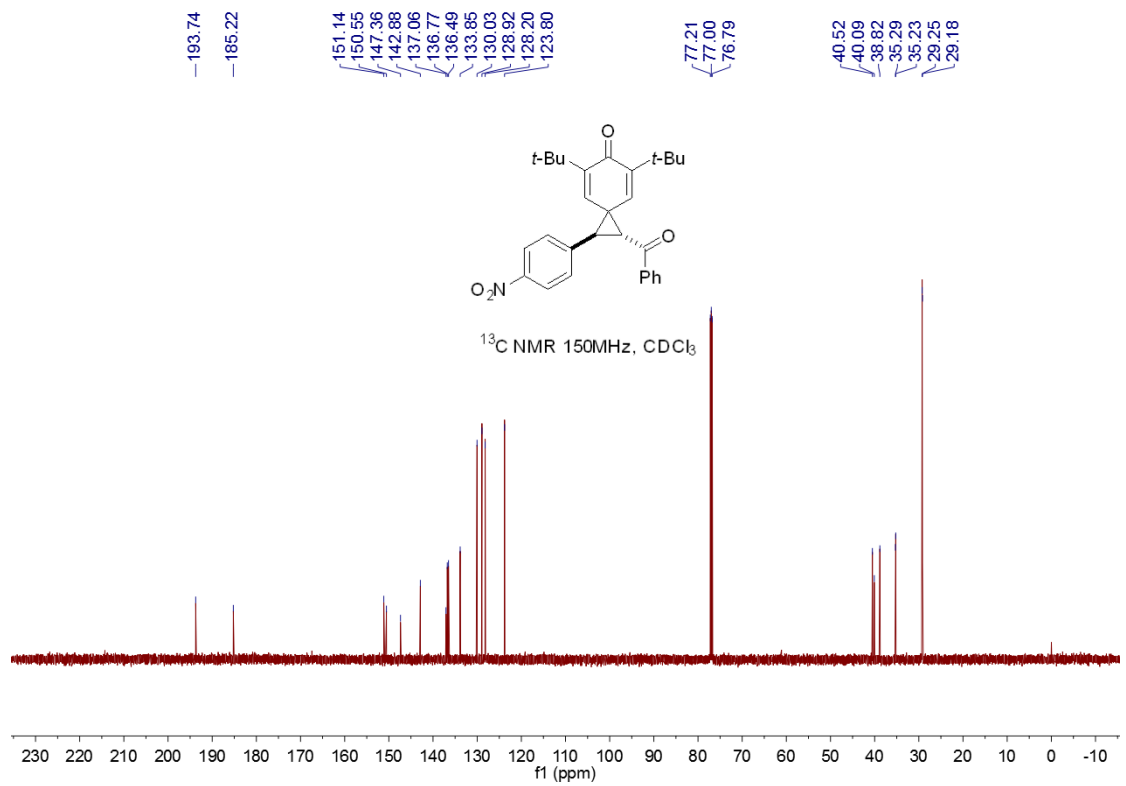

NMR copies of compound **4j**:

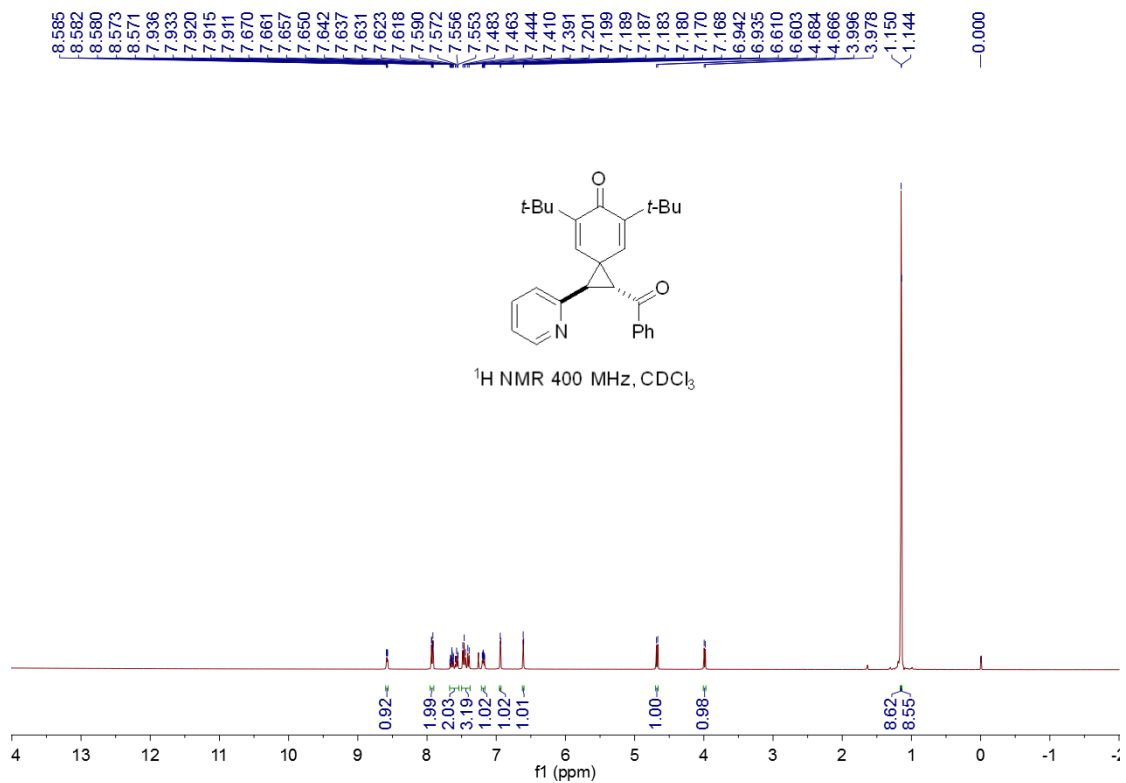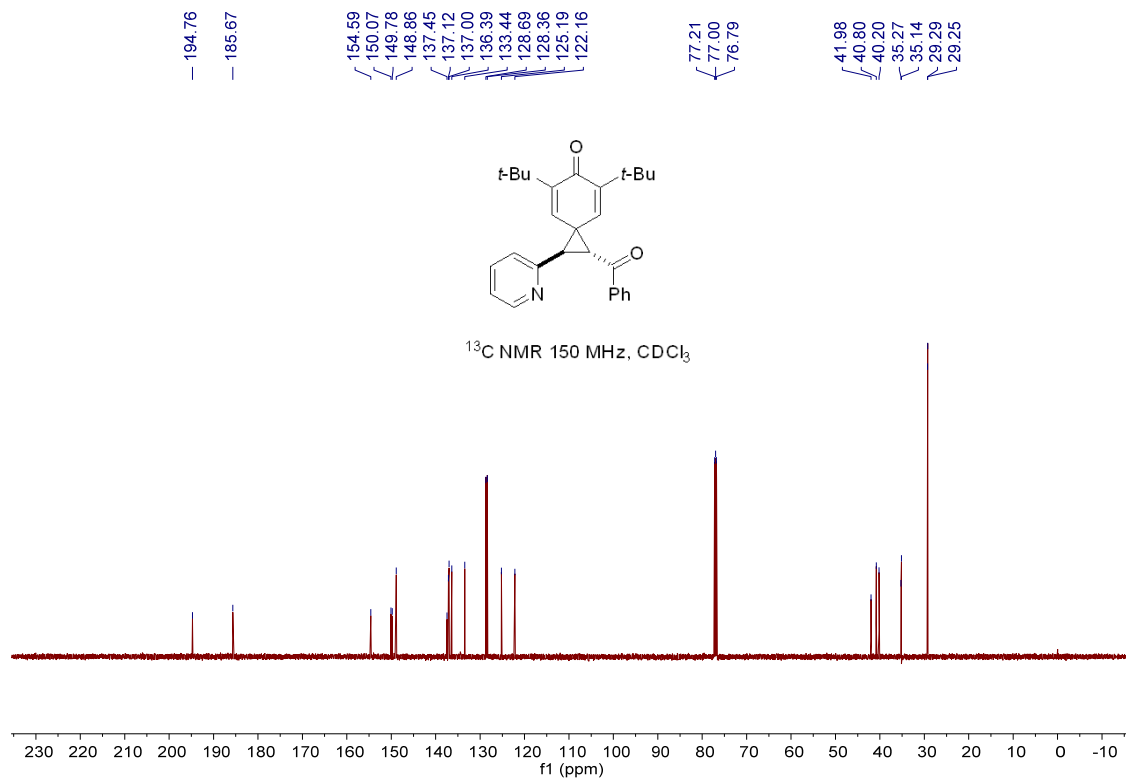

NMR copies of compound **4k**:

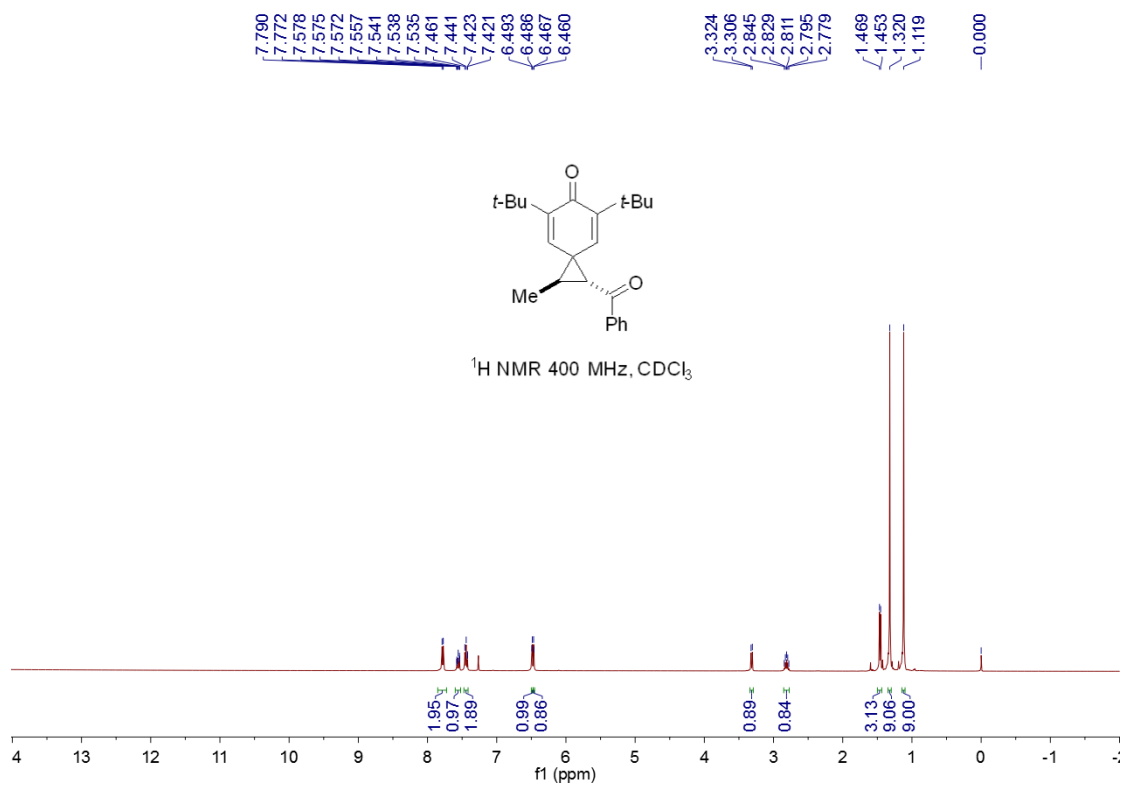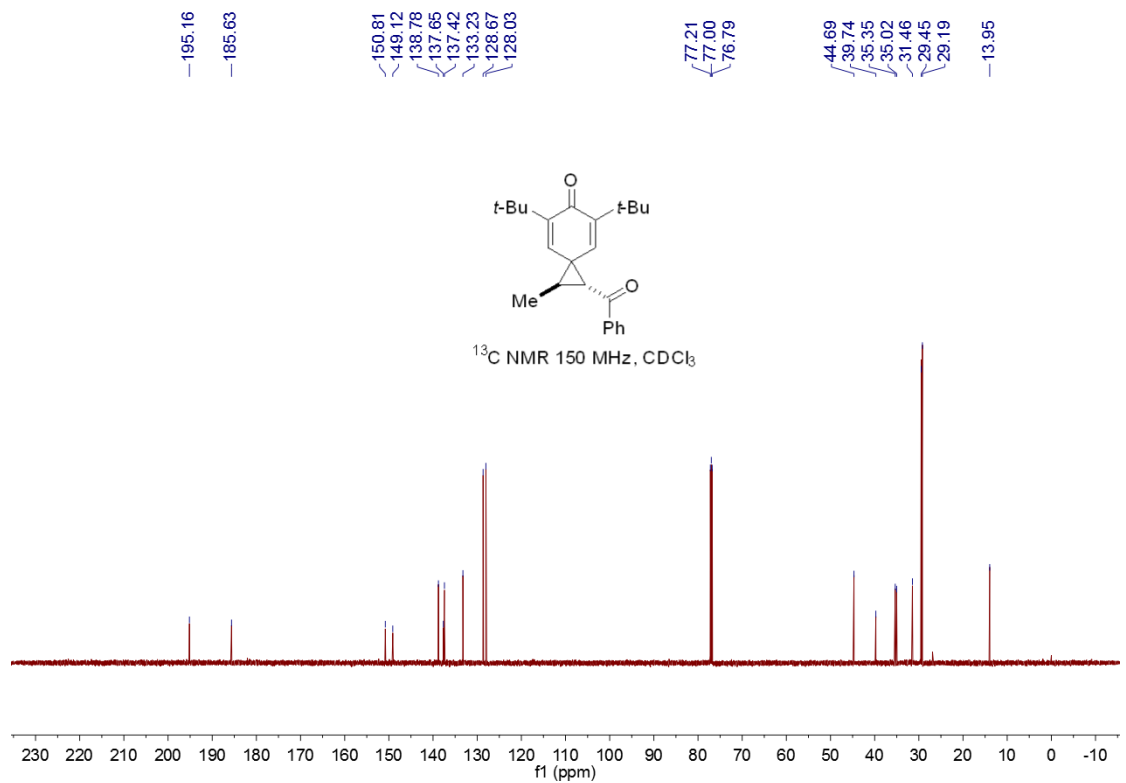

NMR copies of compound **4l**:

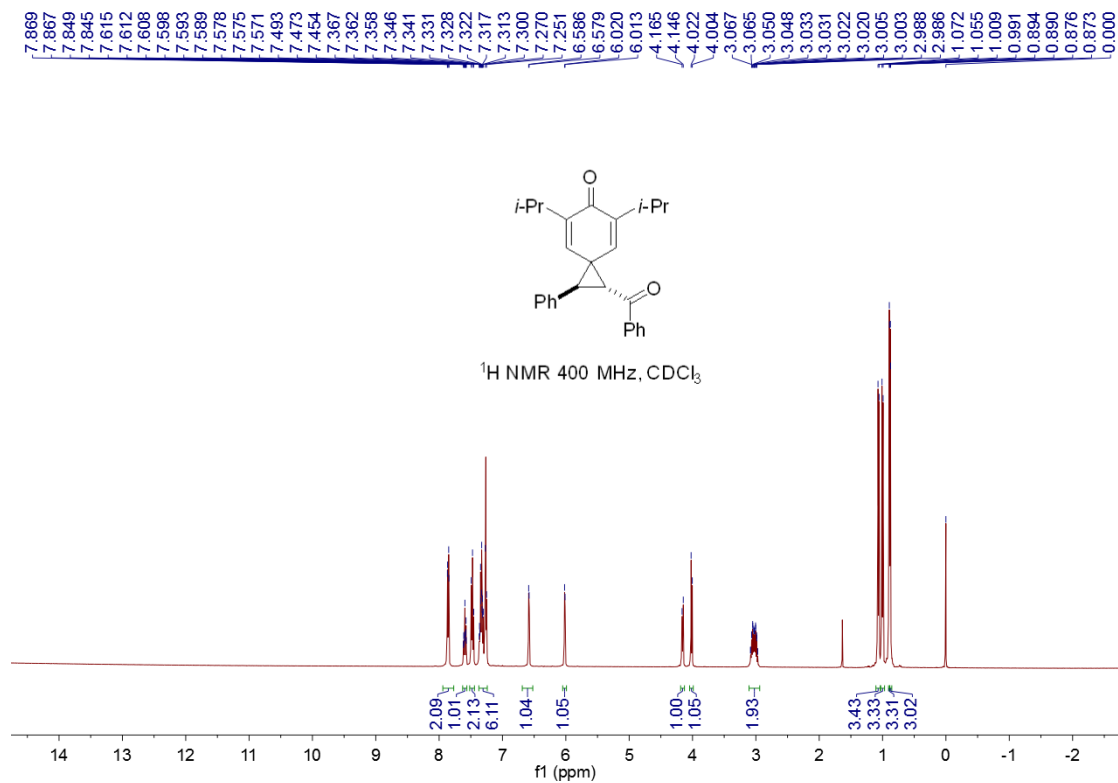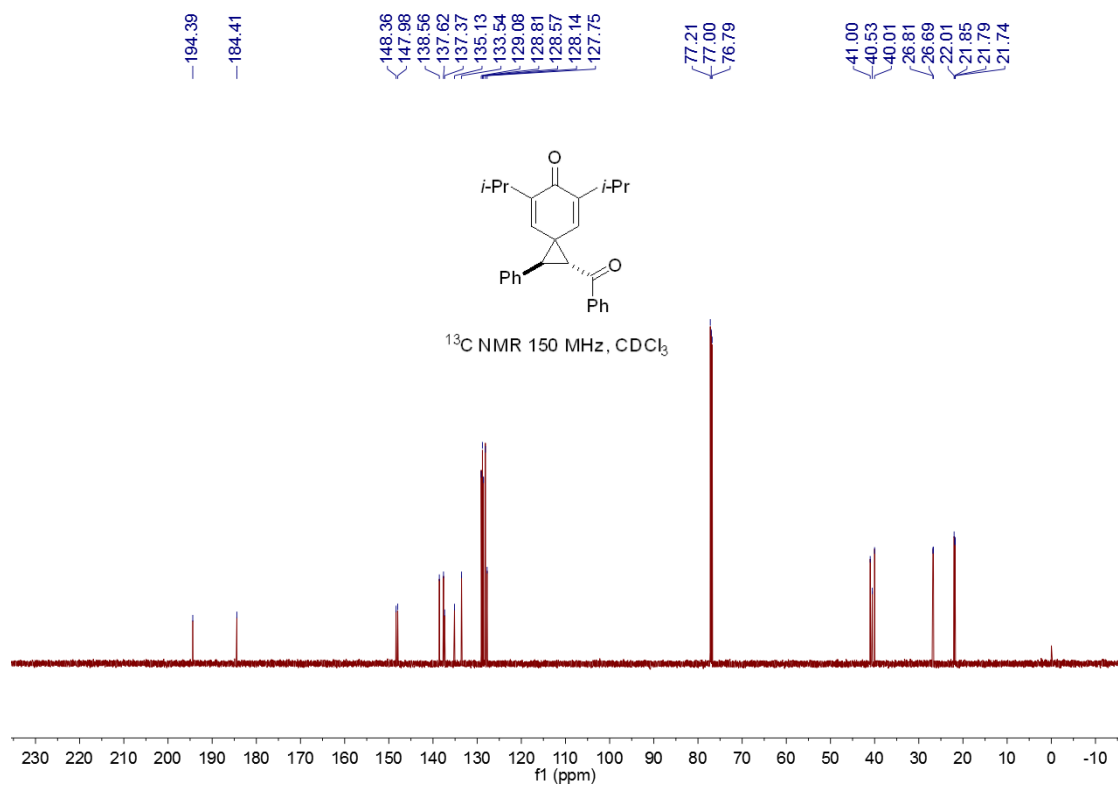

NMR copies of compound **4m**:

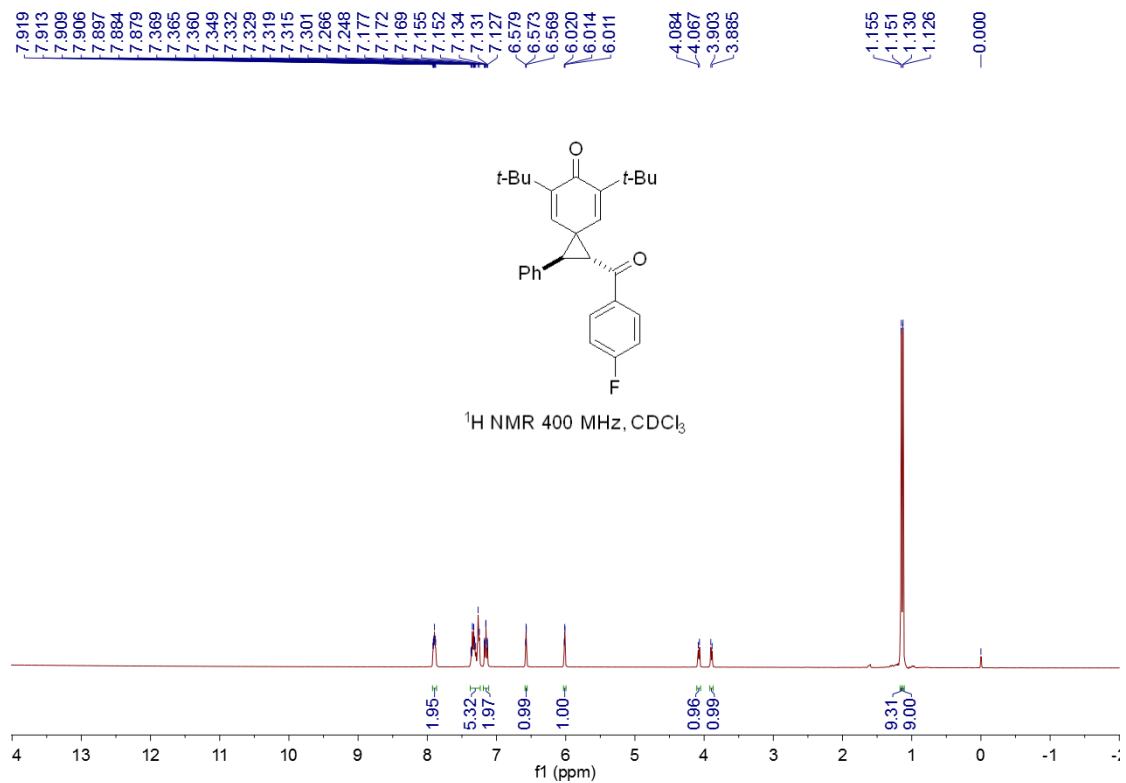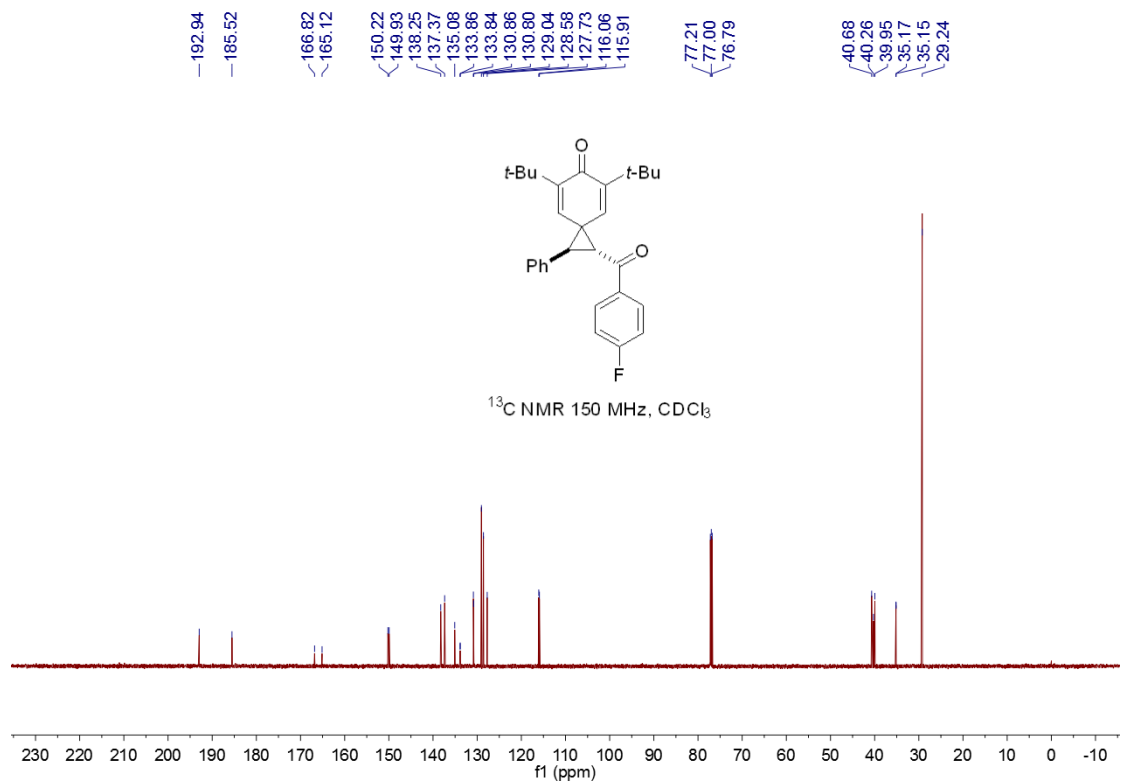

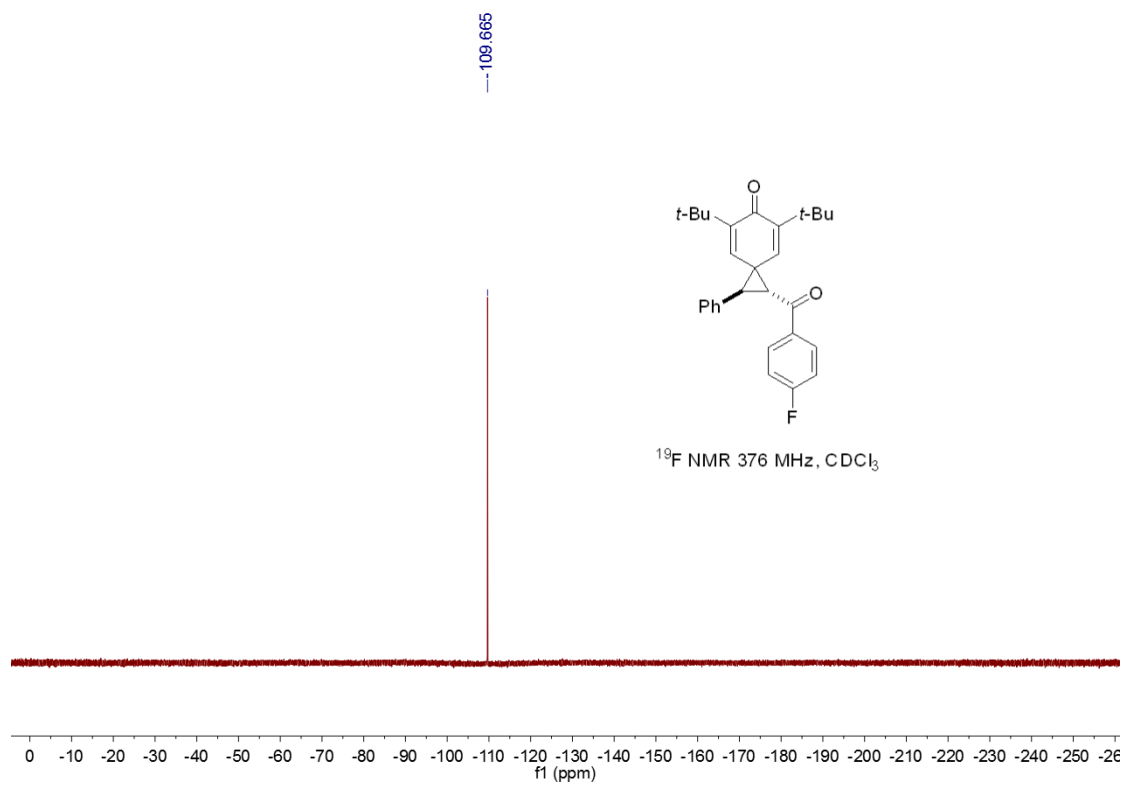



NMR copies of compound **4n**:

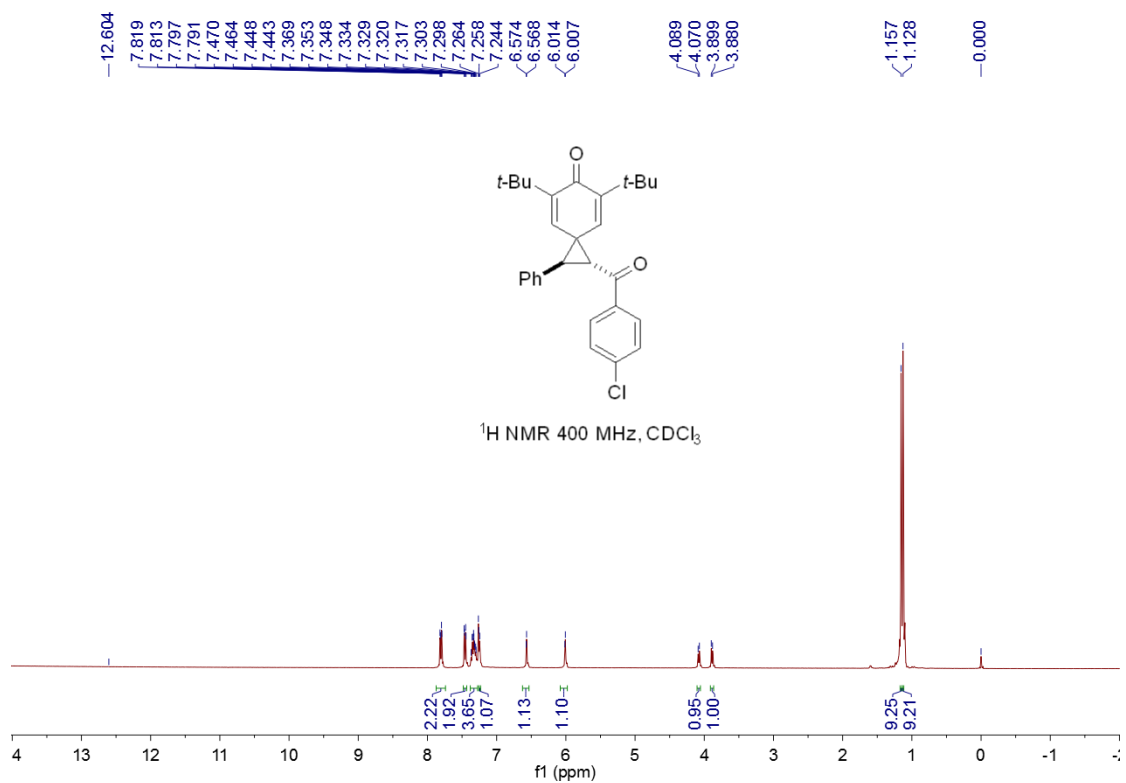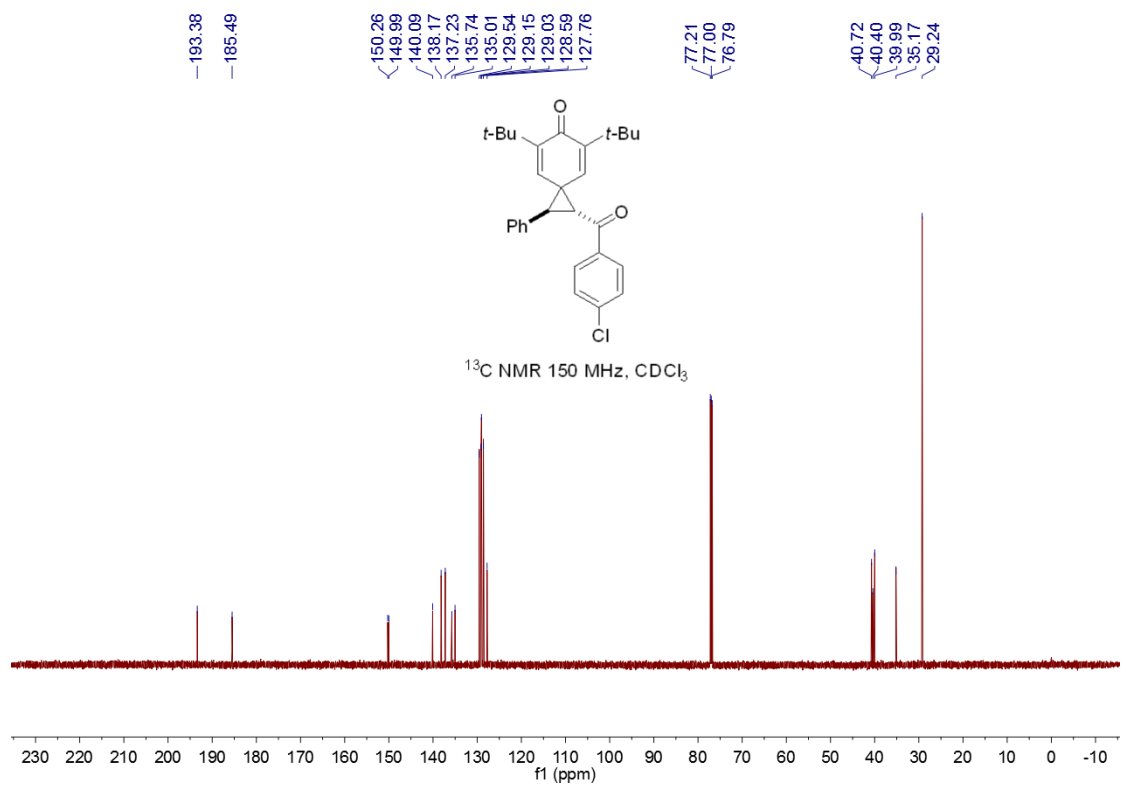

NMR copies of compound **4o**:

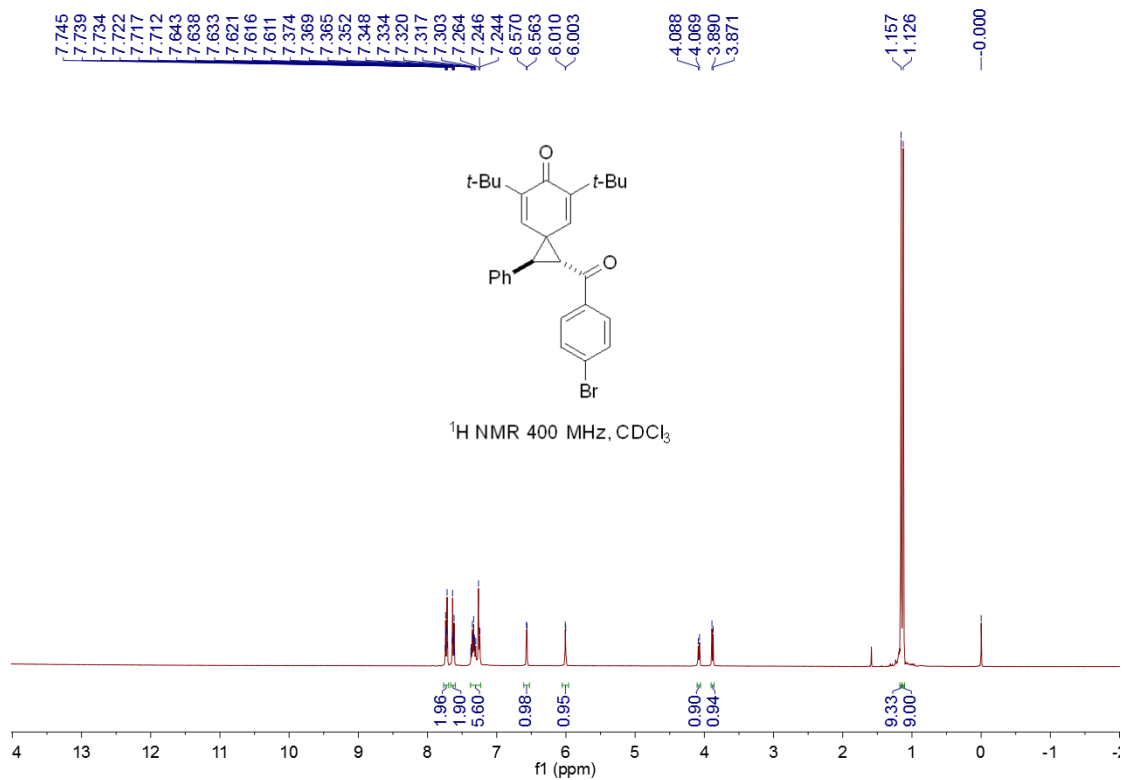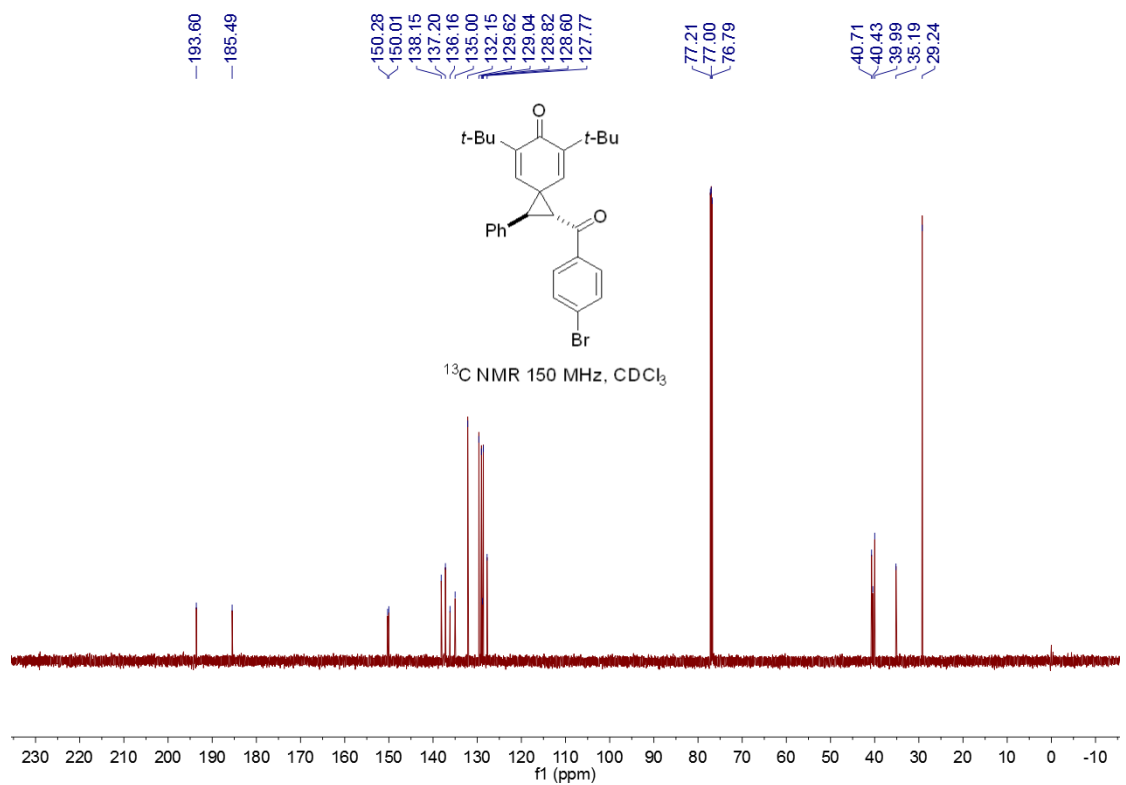

NMR copies of compound **4p**:

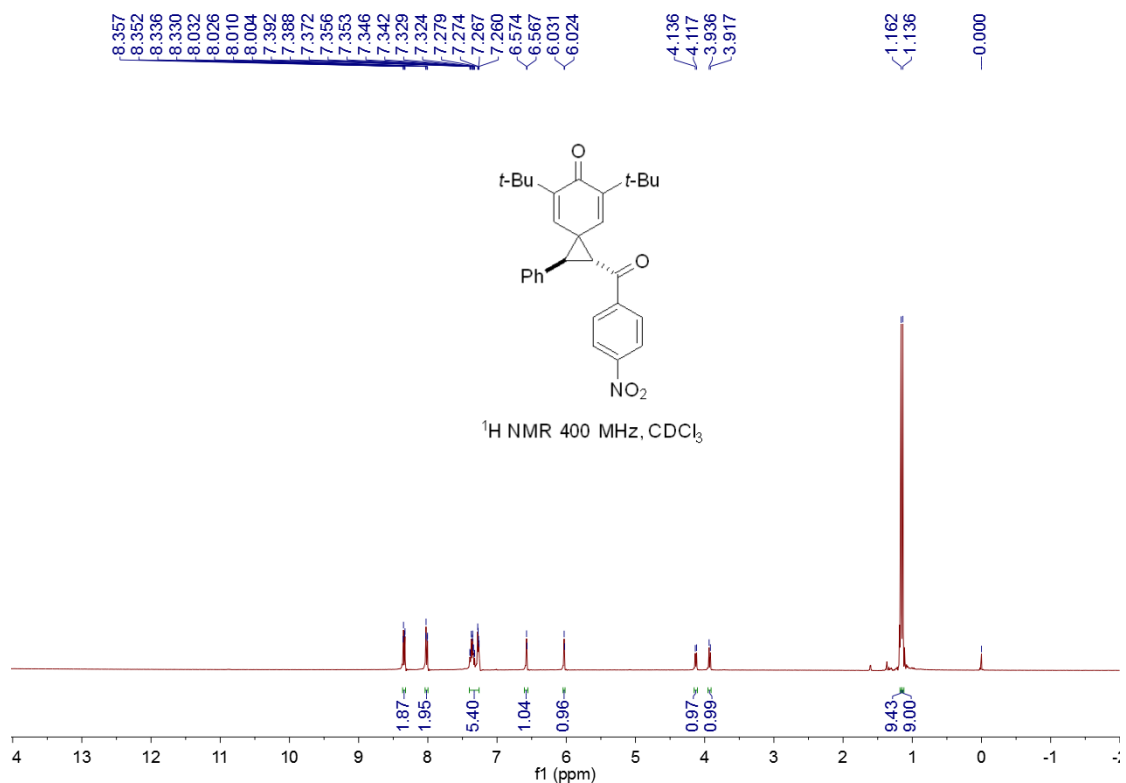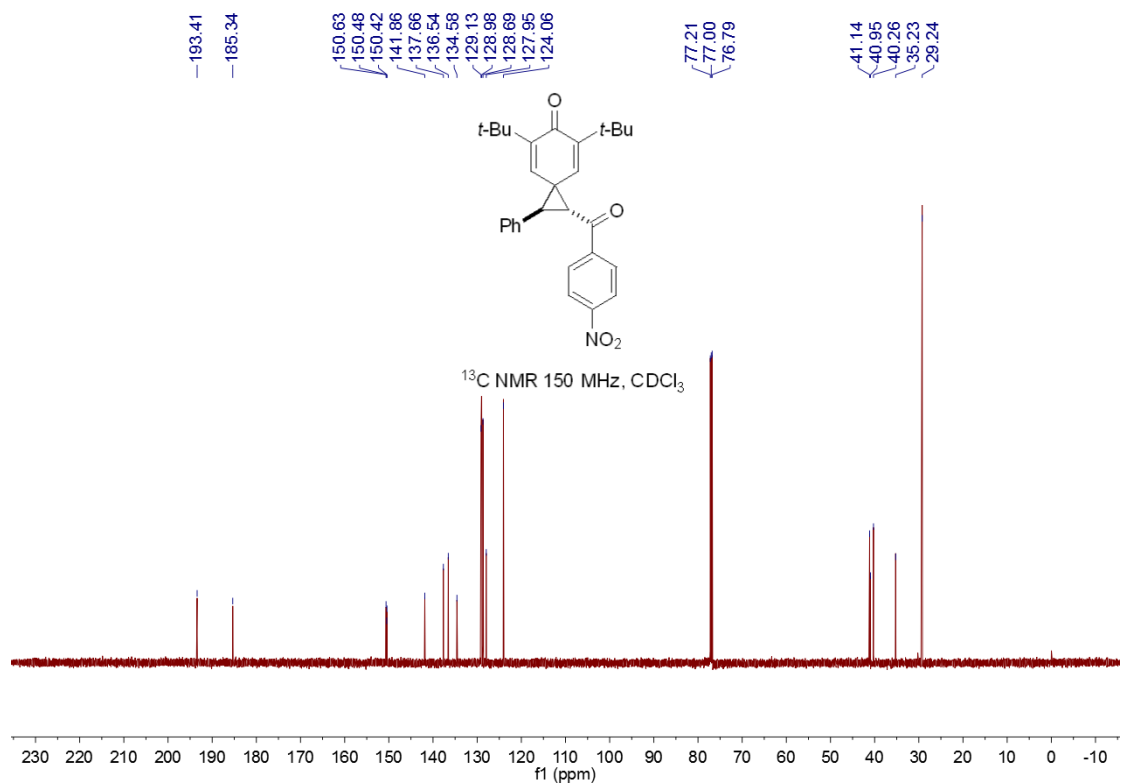

NMR copies of compound **4q**:

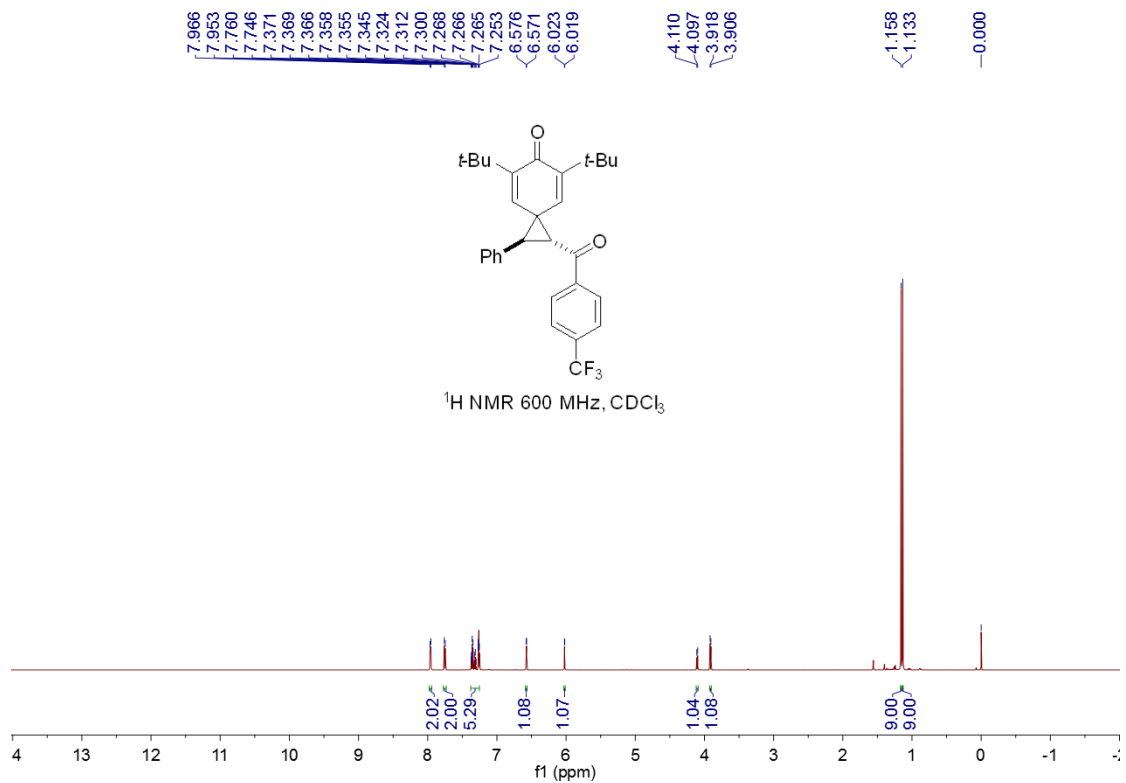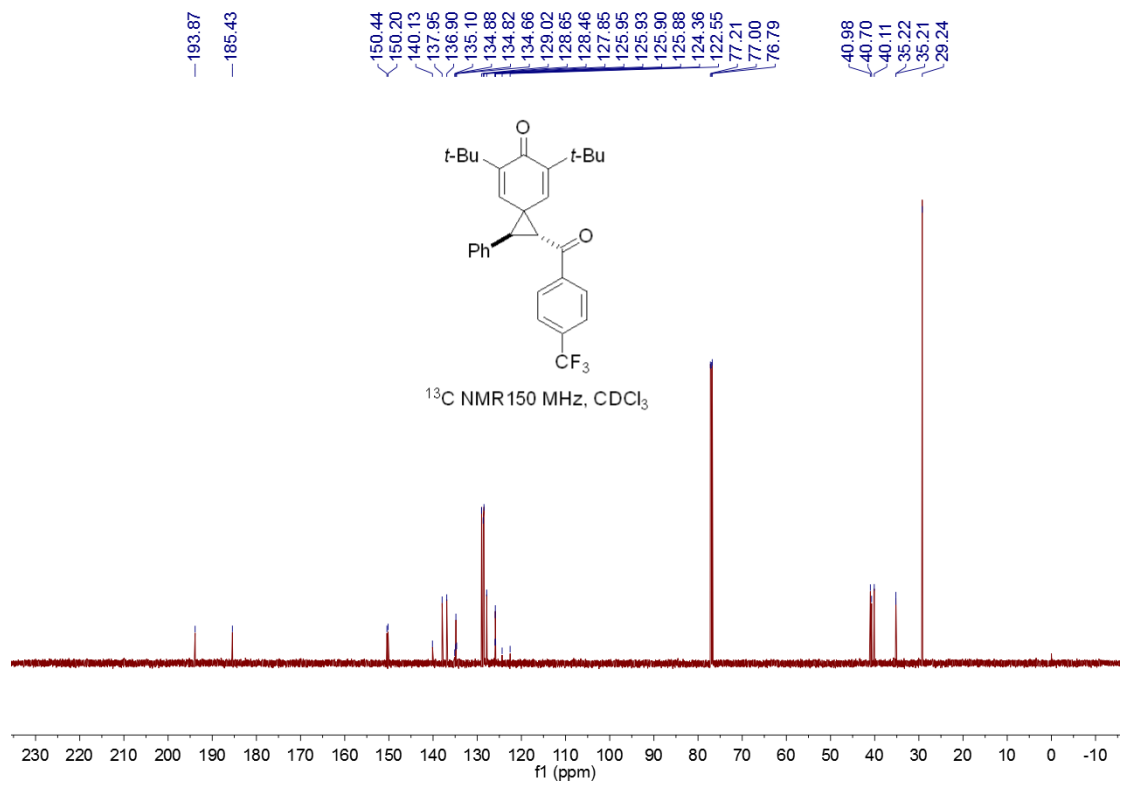

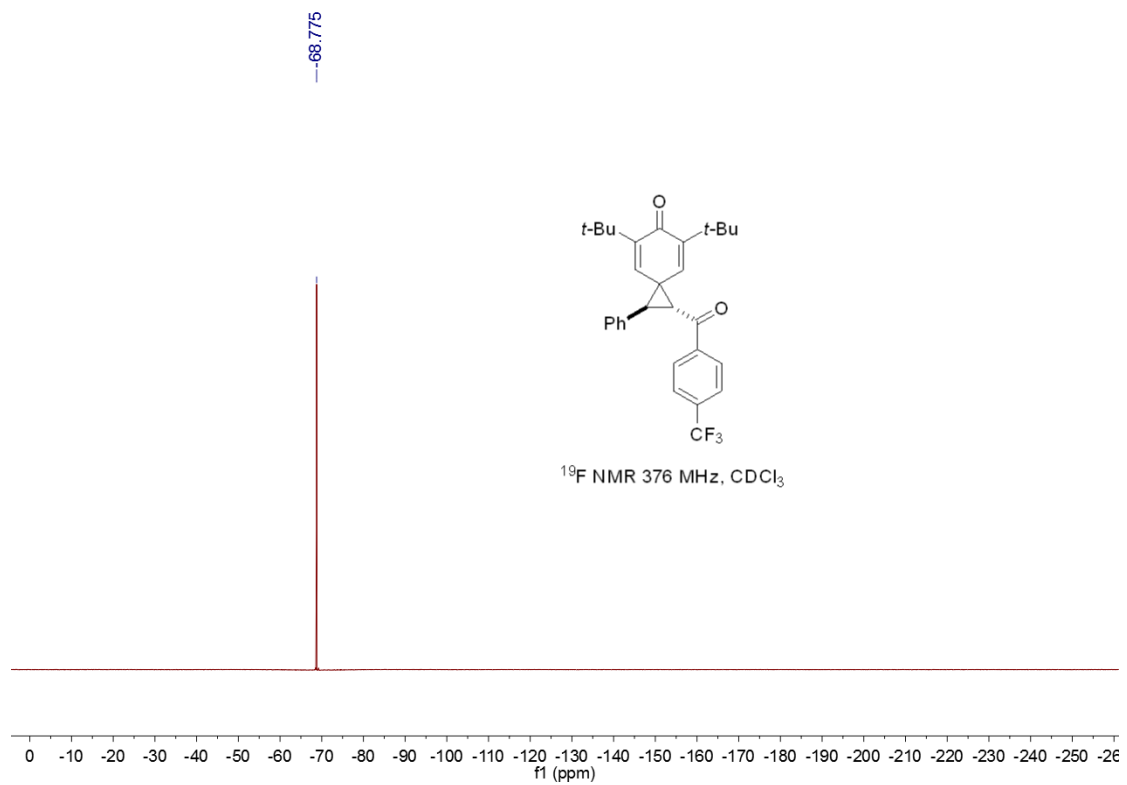

NMR copies of compound **4r**:

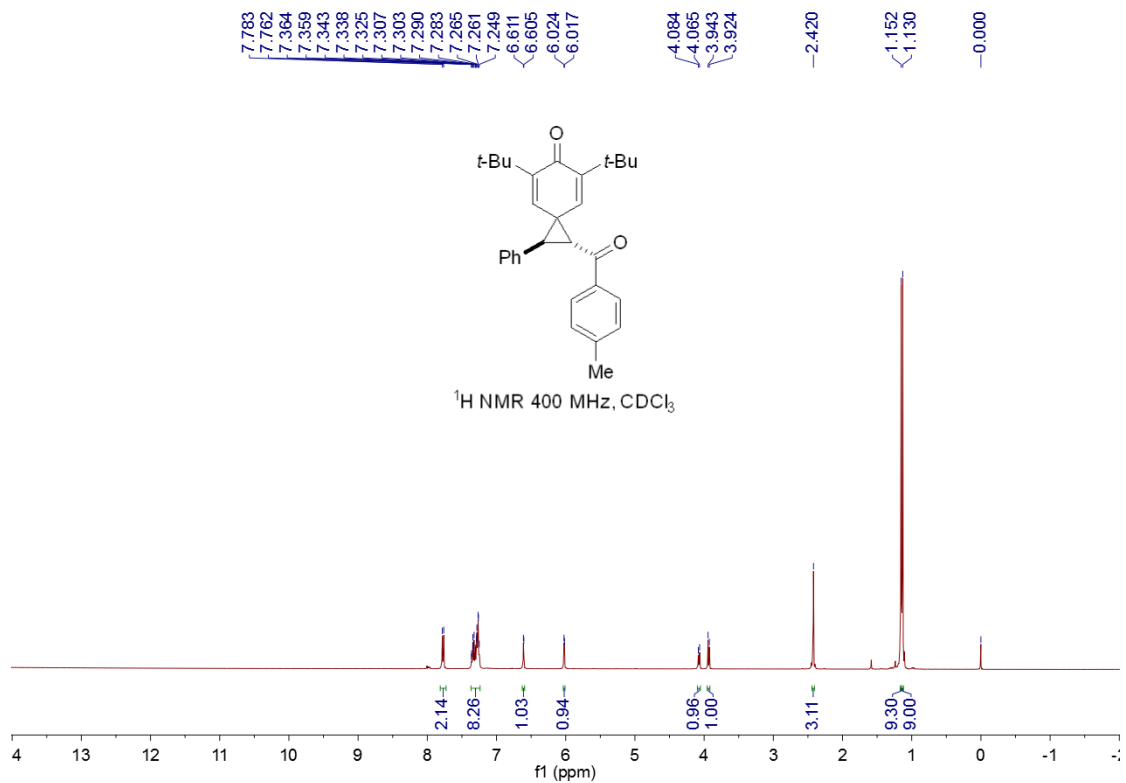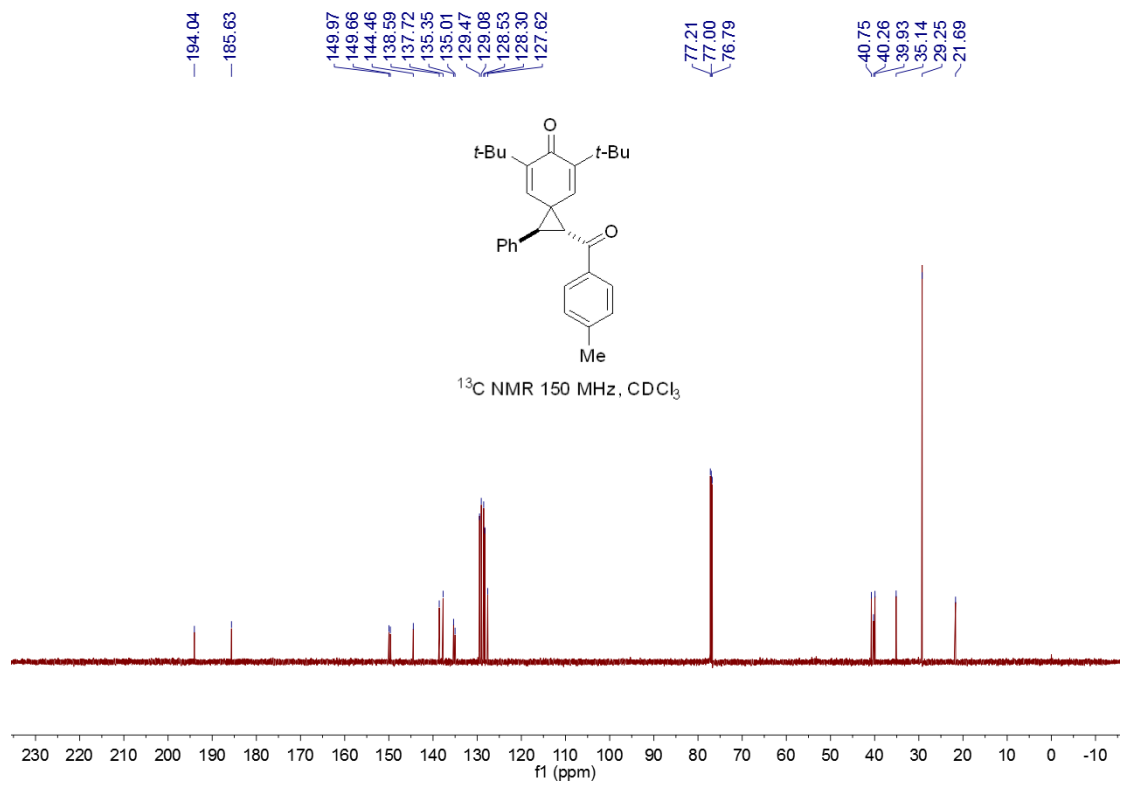

NMR copies of compound **4s**:

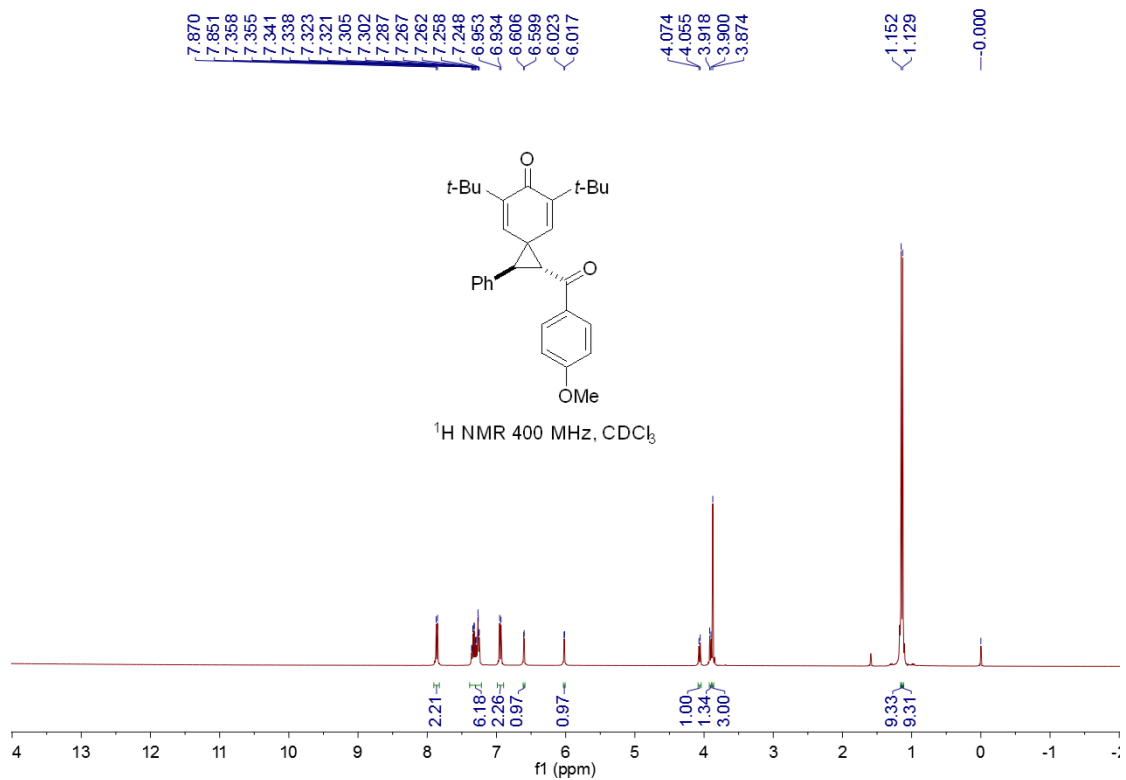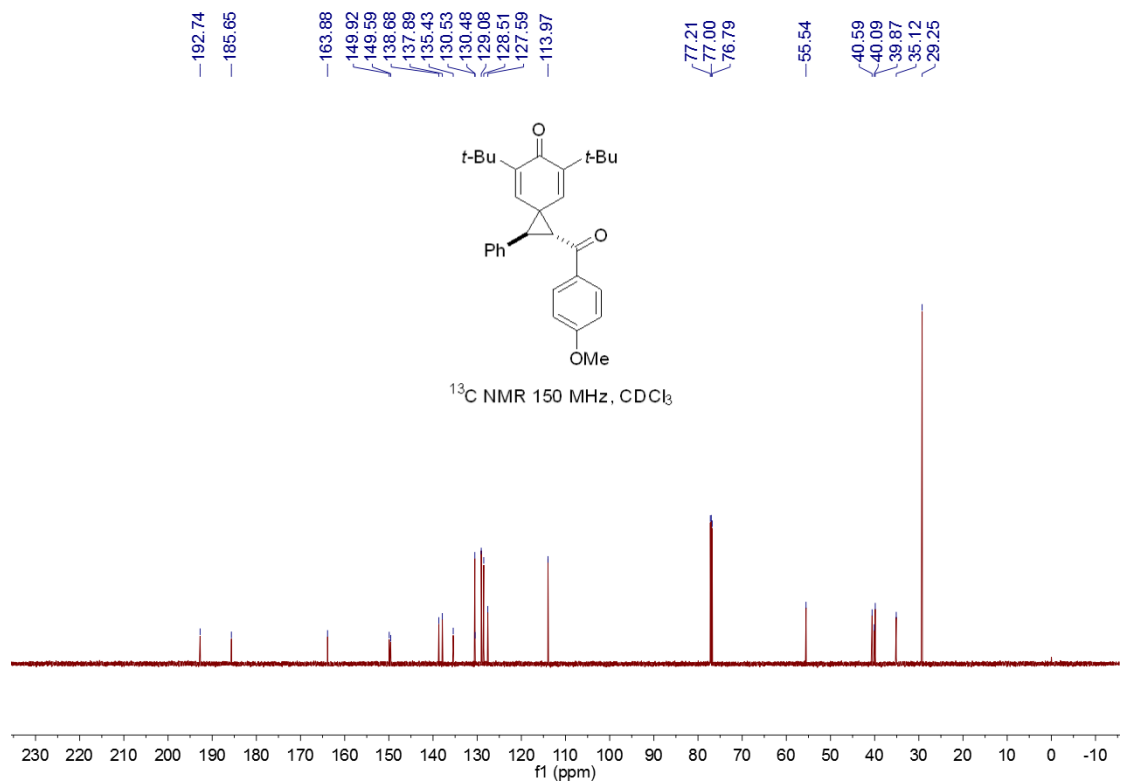

NMR copies of compound **4t**:

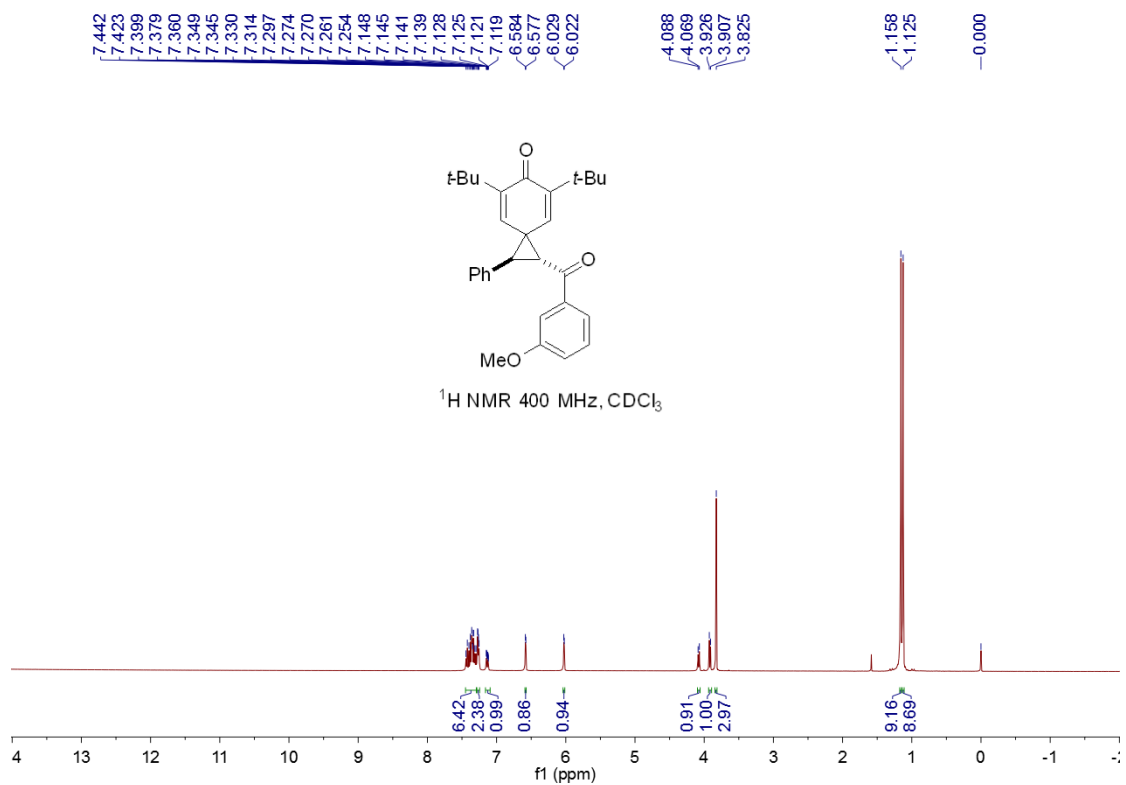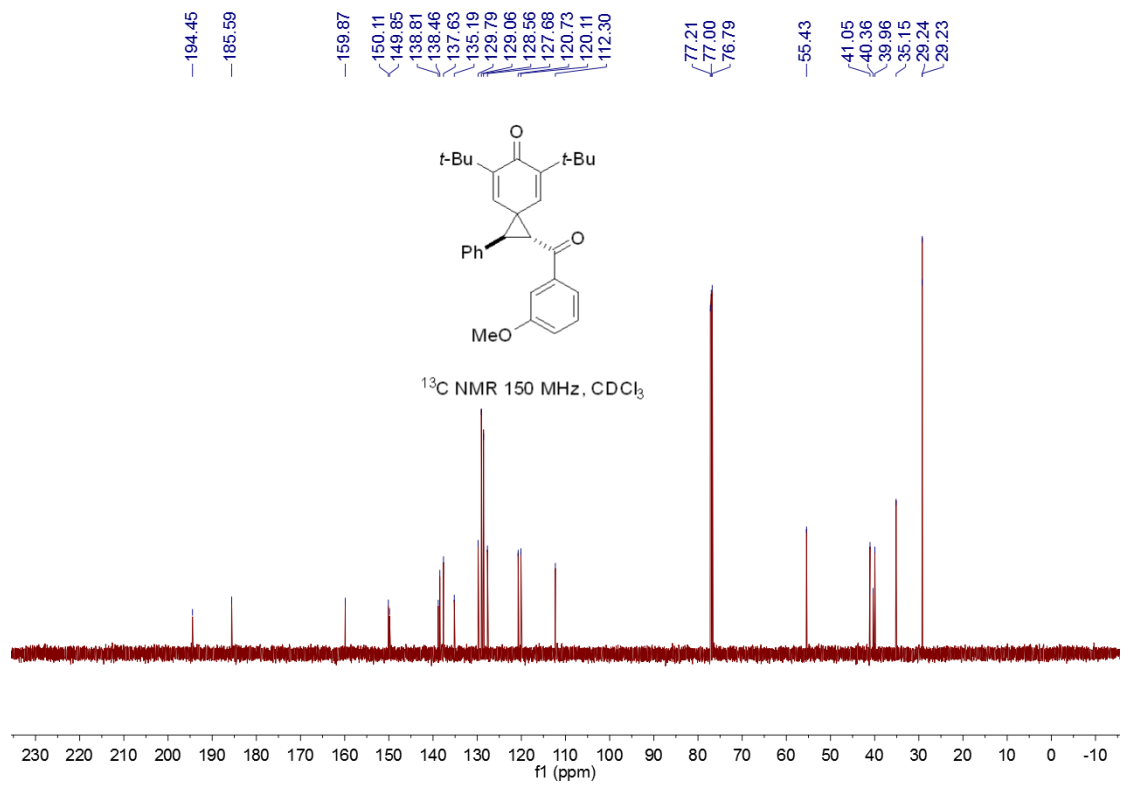



NMR copies of compound **4u**:

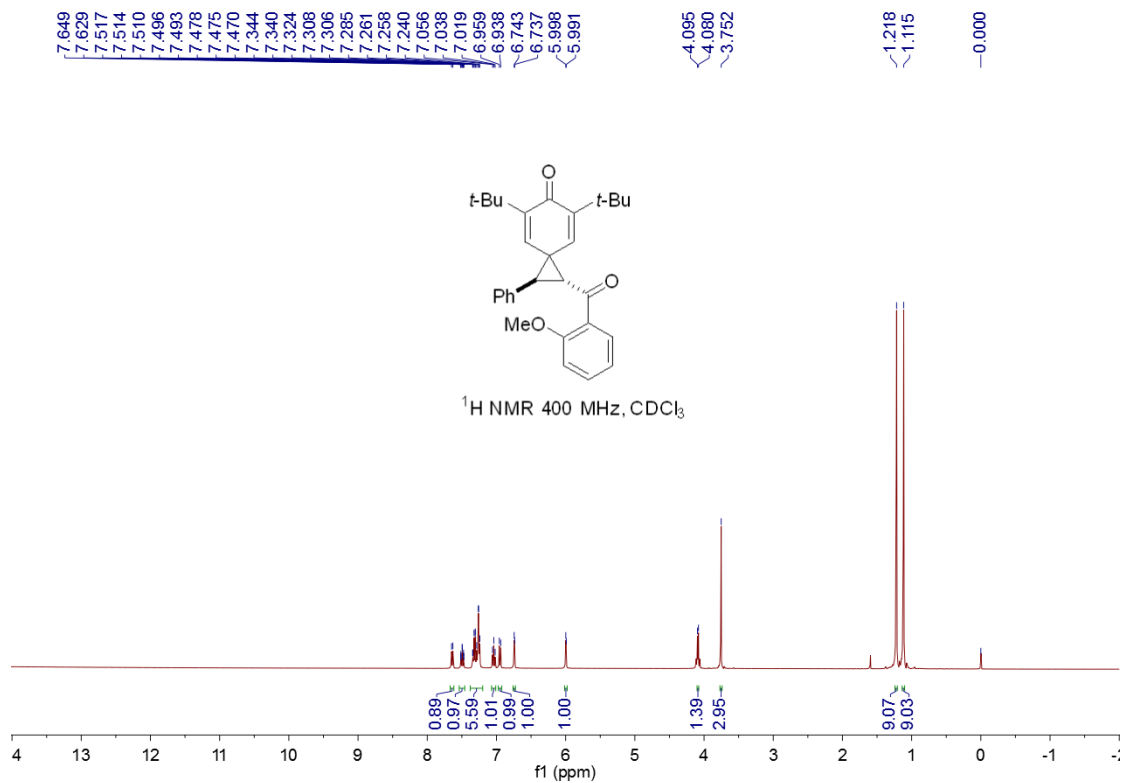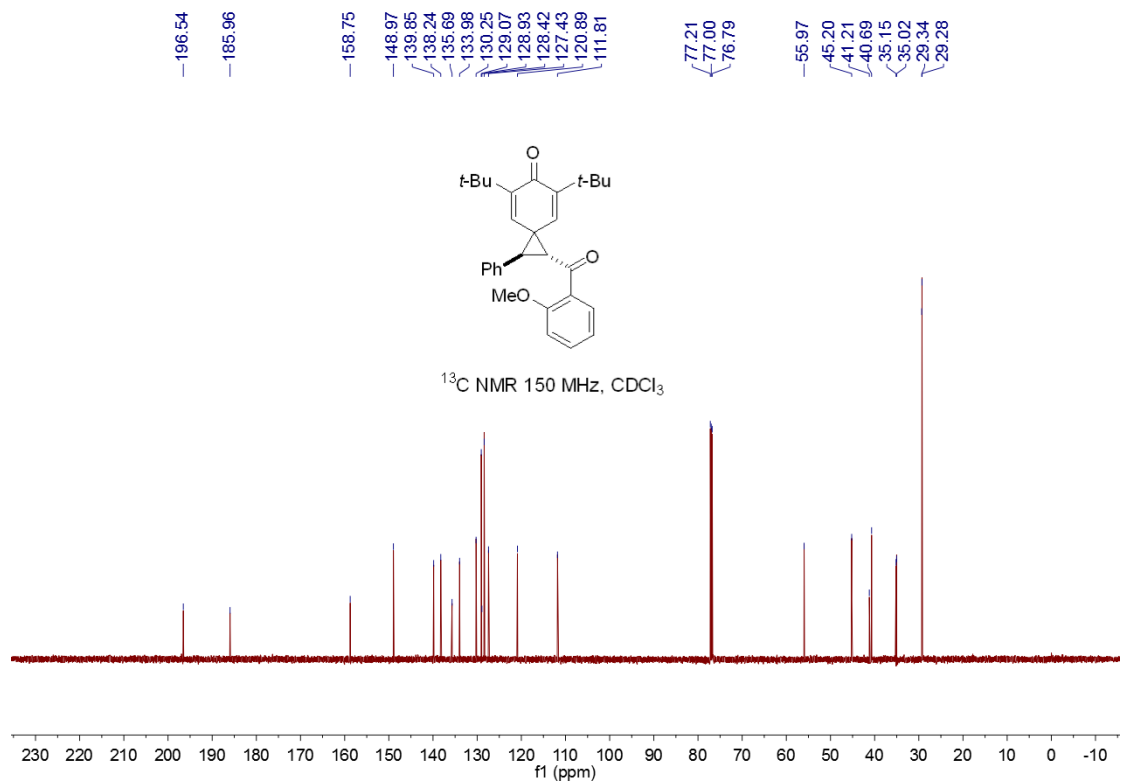

NMR copies of compound **4v**:

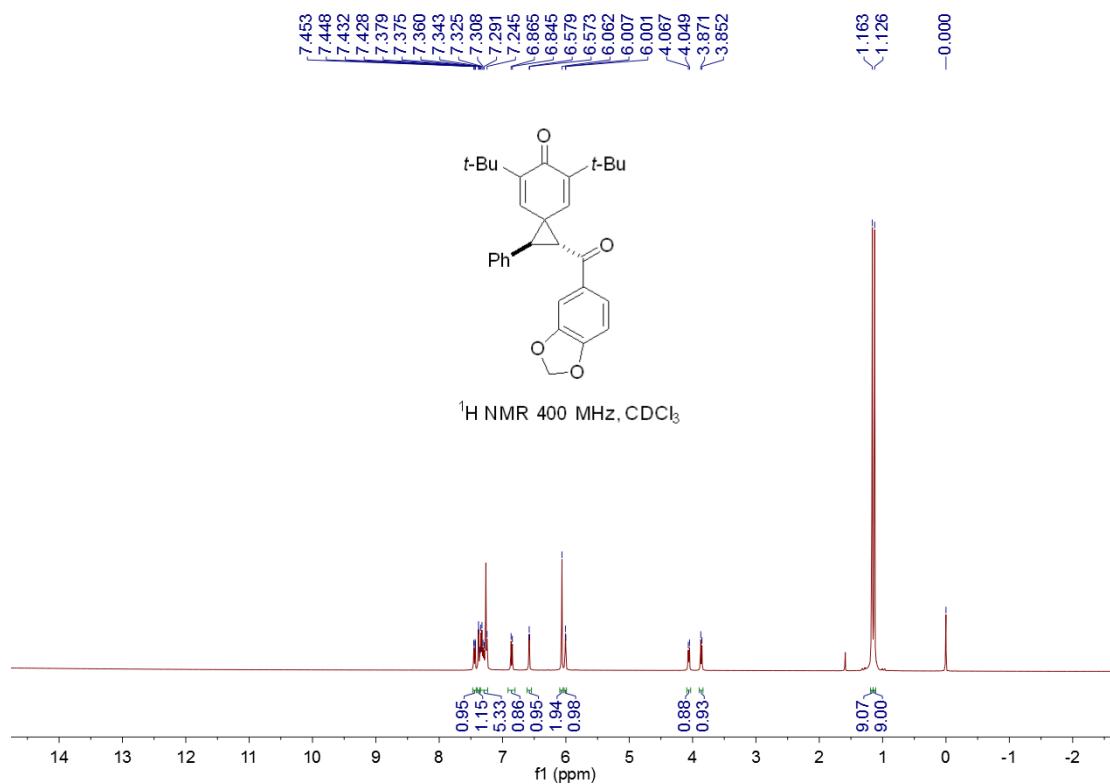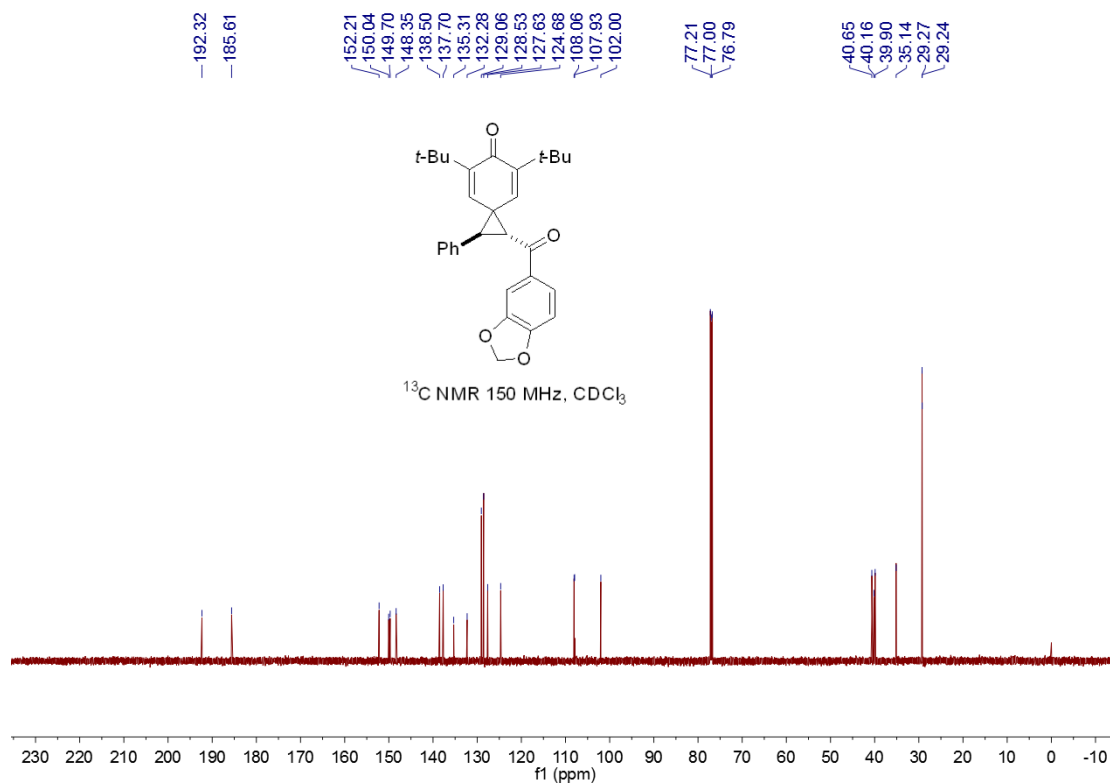

NMR copies of compound **4w**:

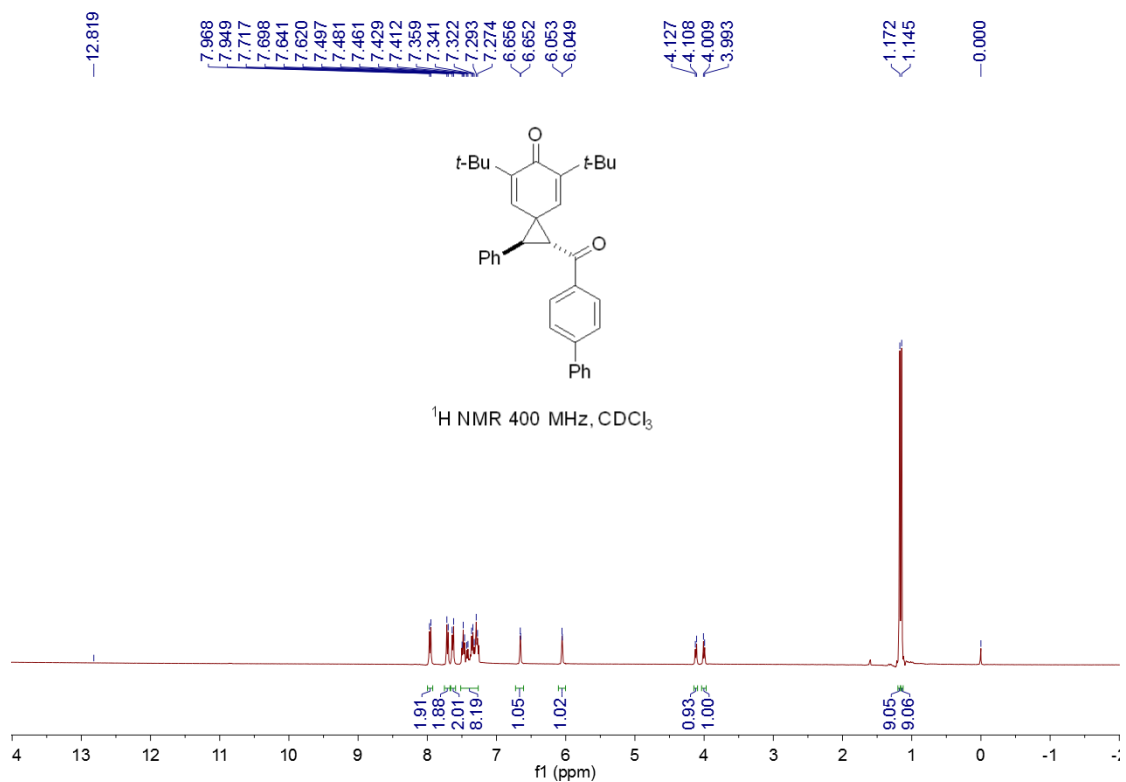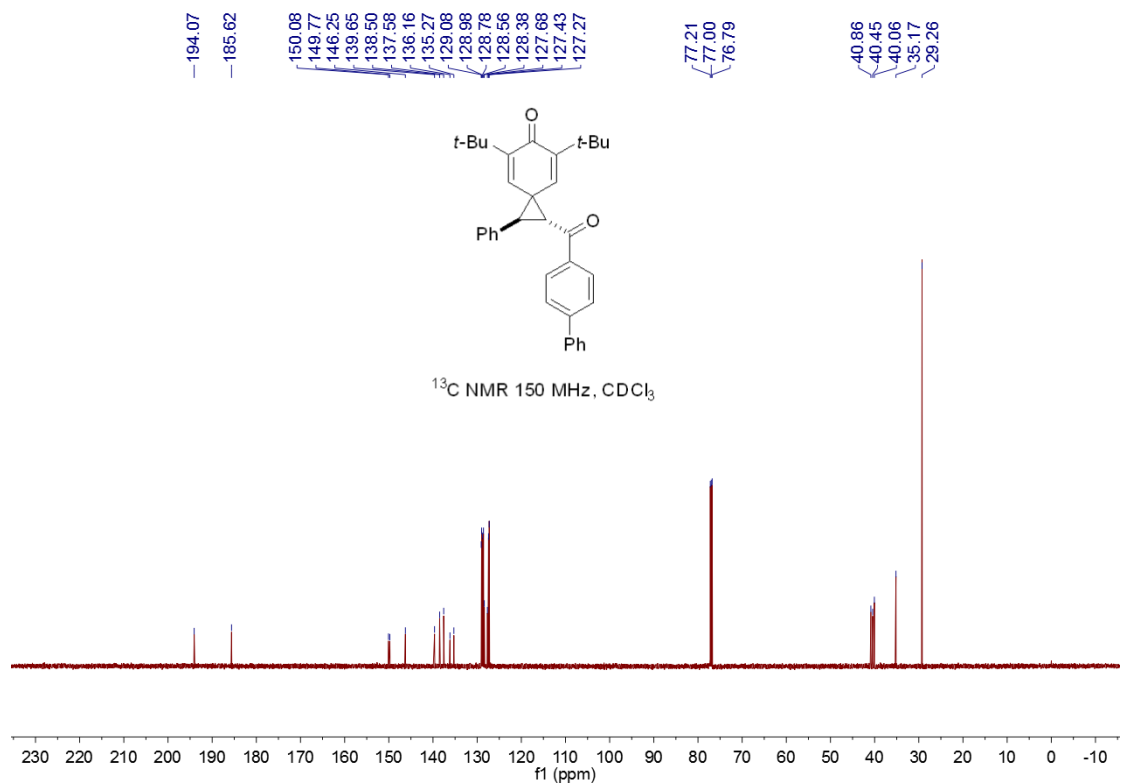

NMR copies of compound **4x**:

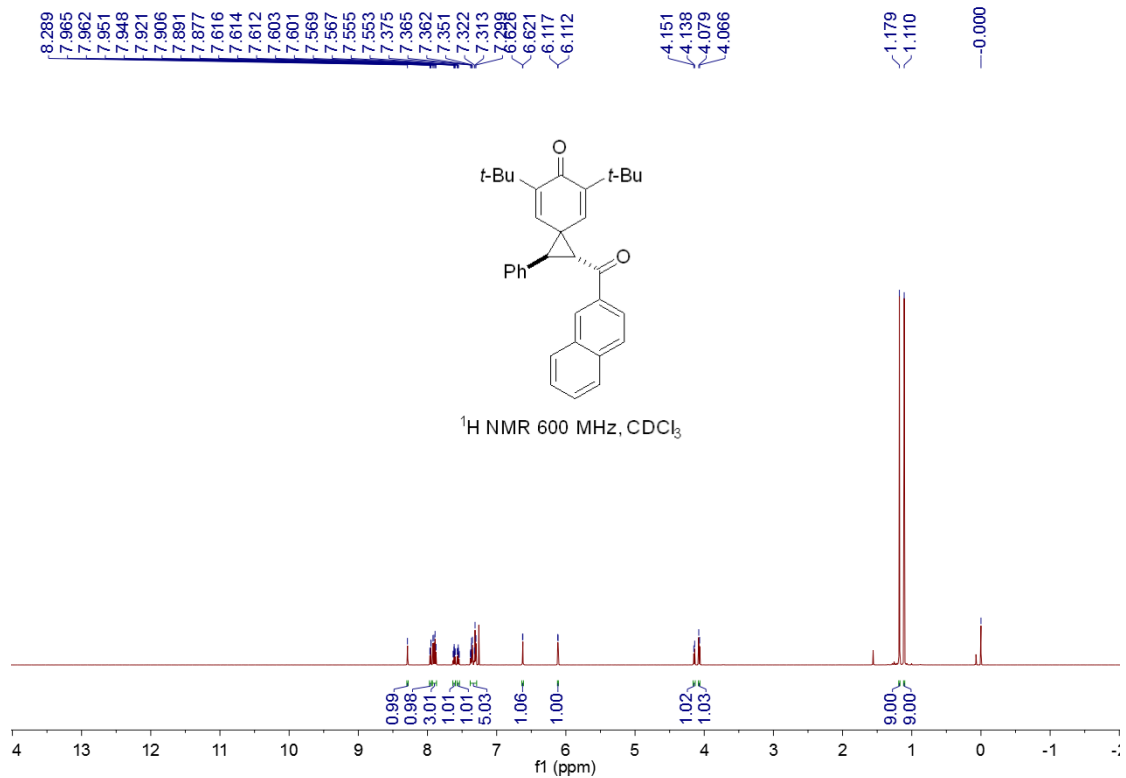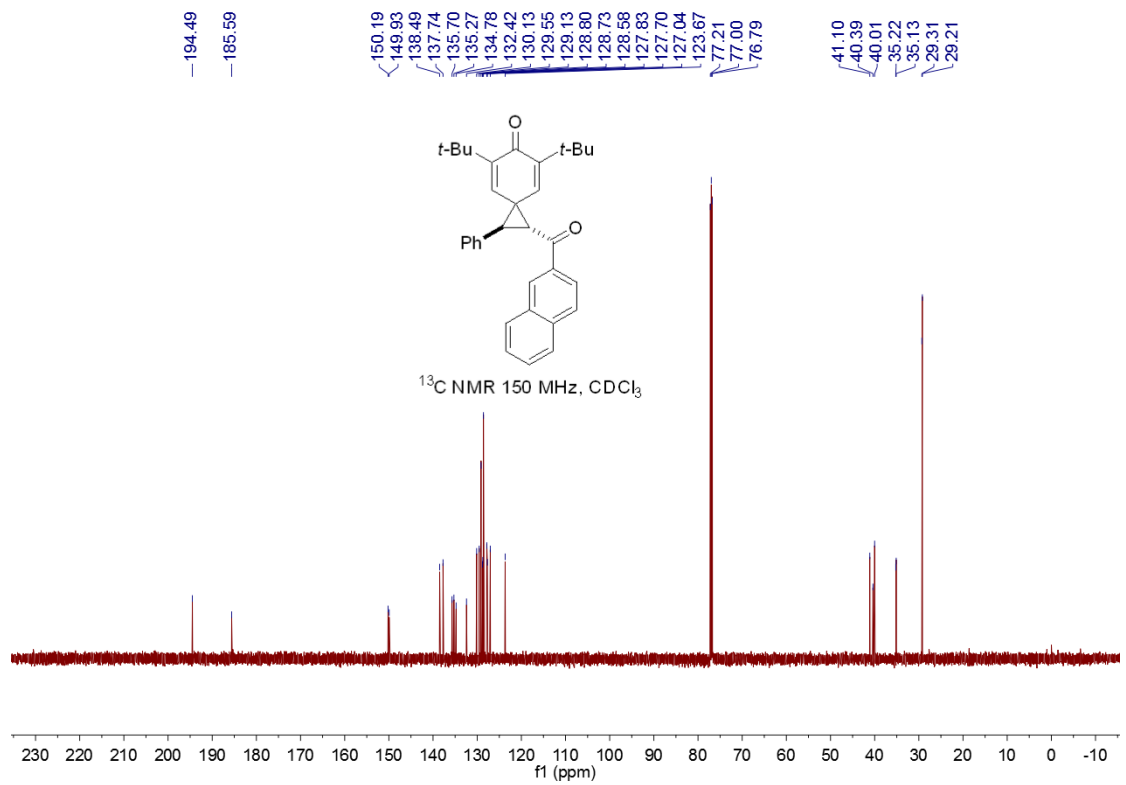

NMR copies of compound **4y**:

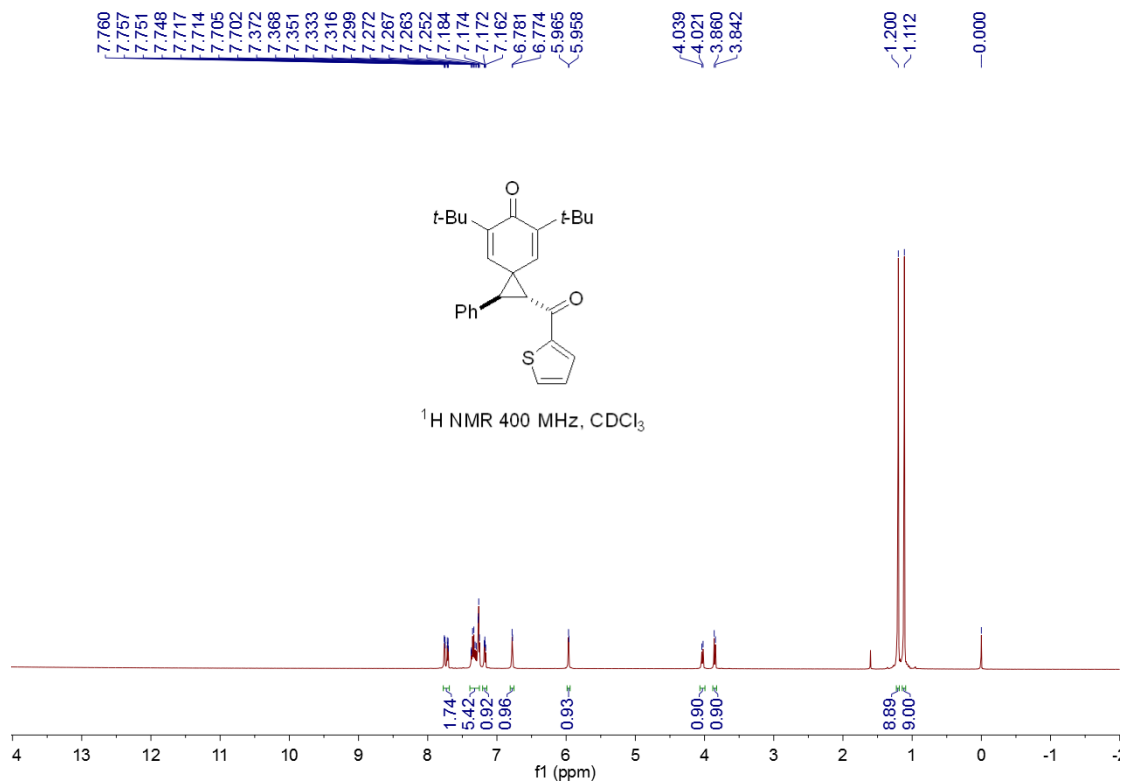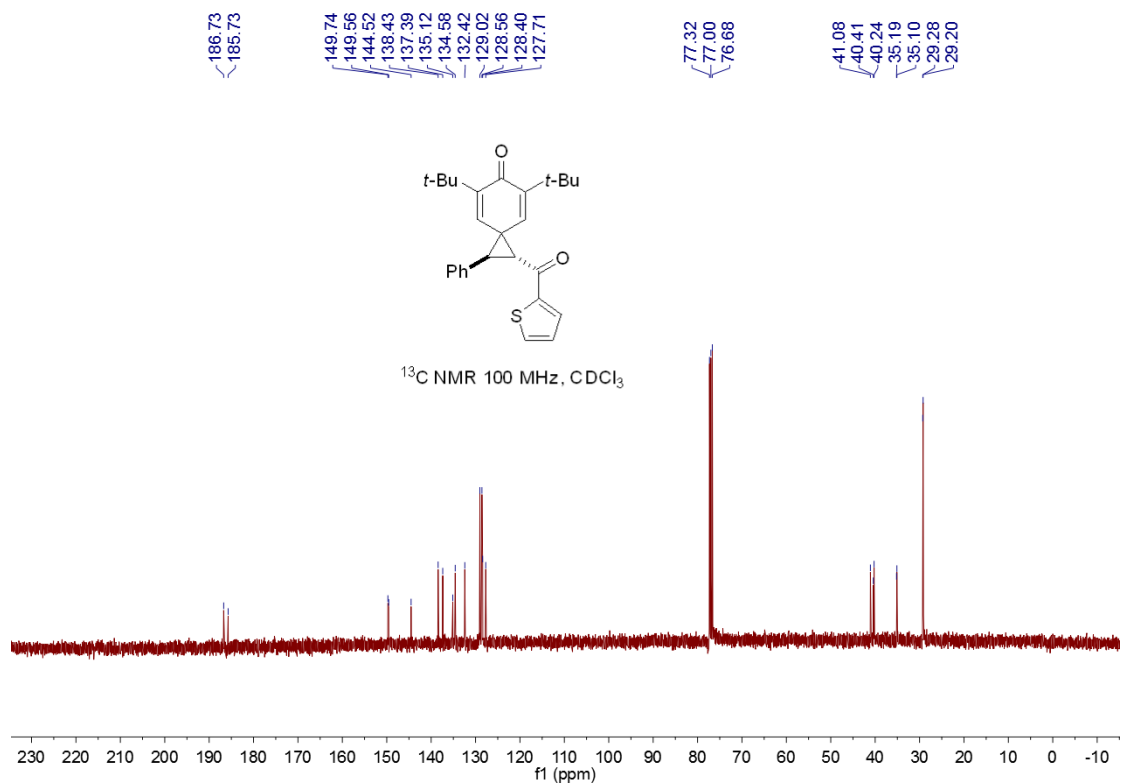

## 2. NMR copies of compounds 6a-6n.

NMR copies of compound **6a**:

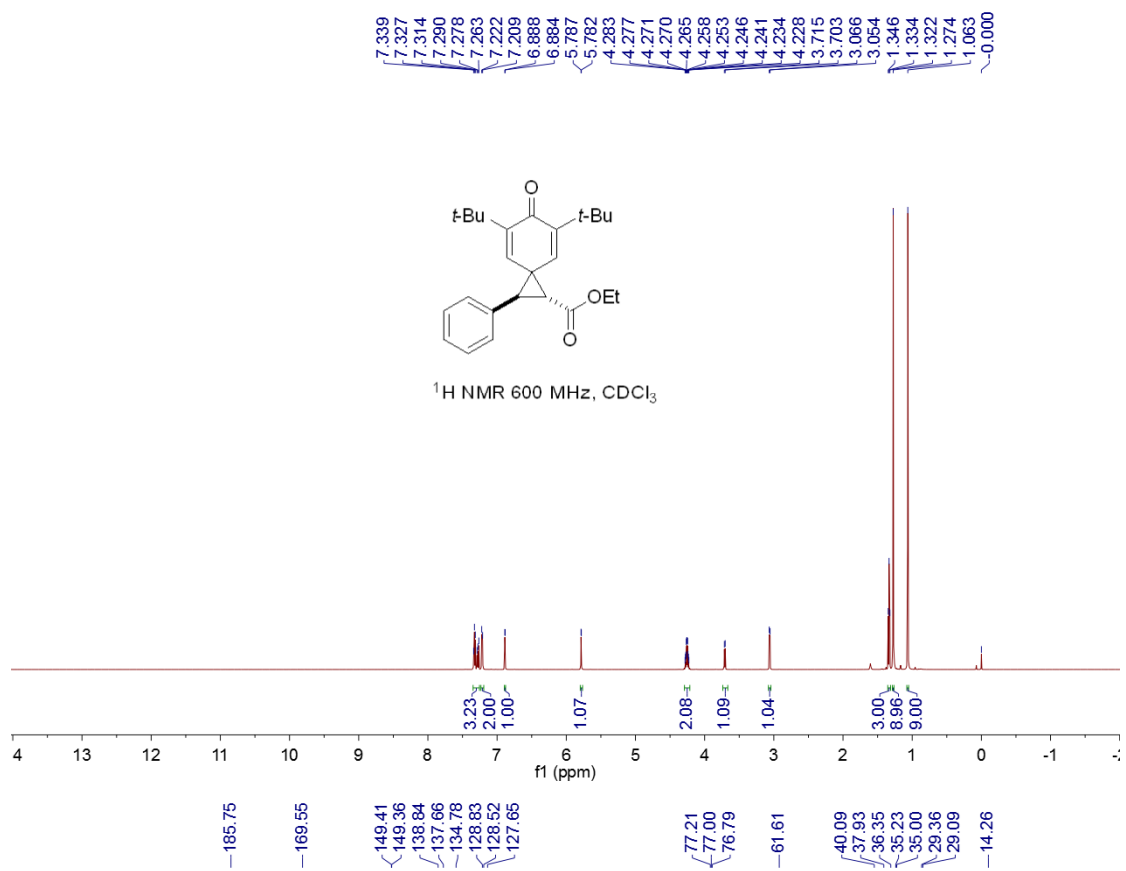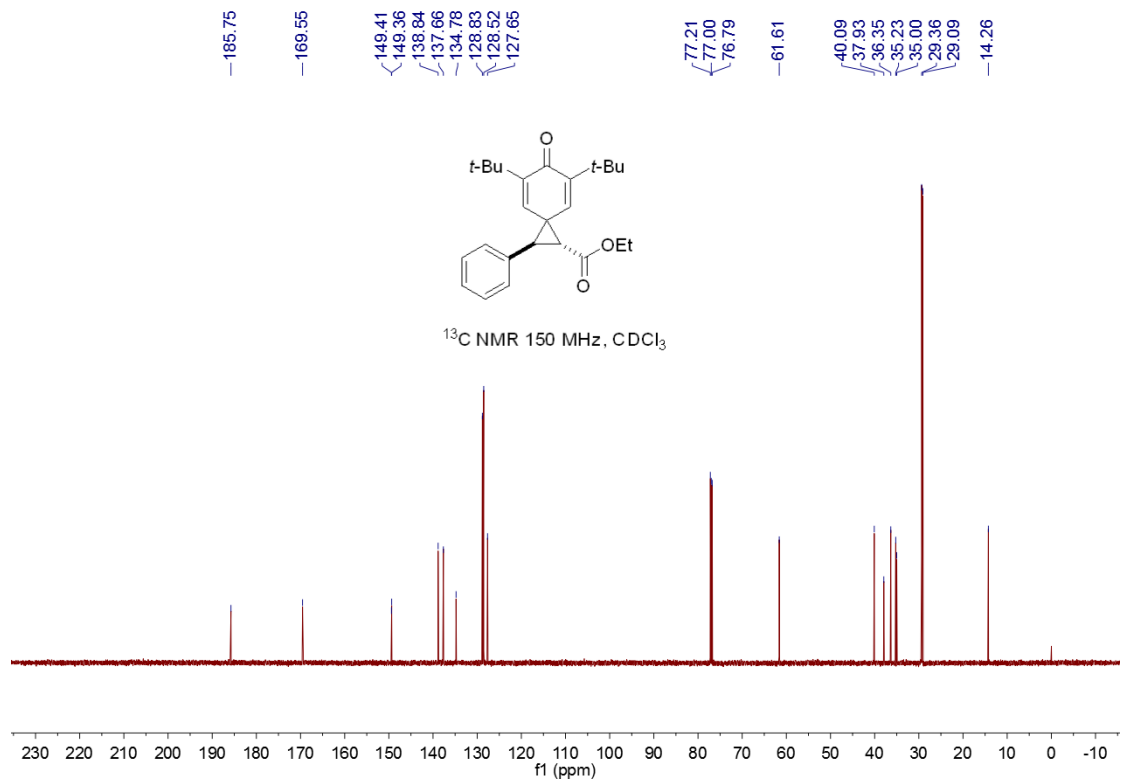

NMR copies of compound **6b**:

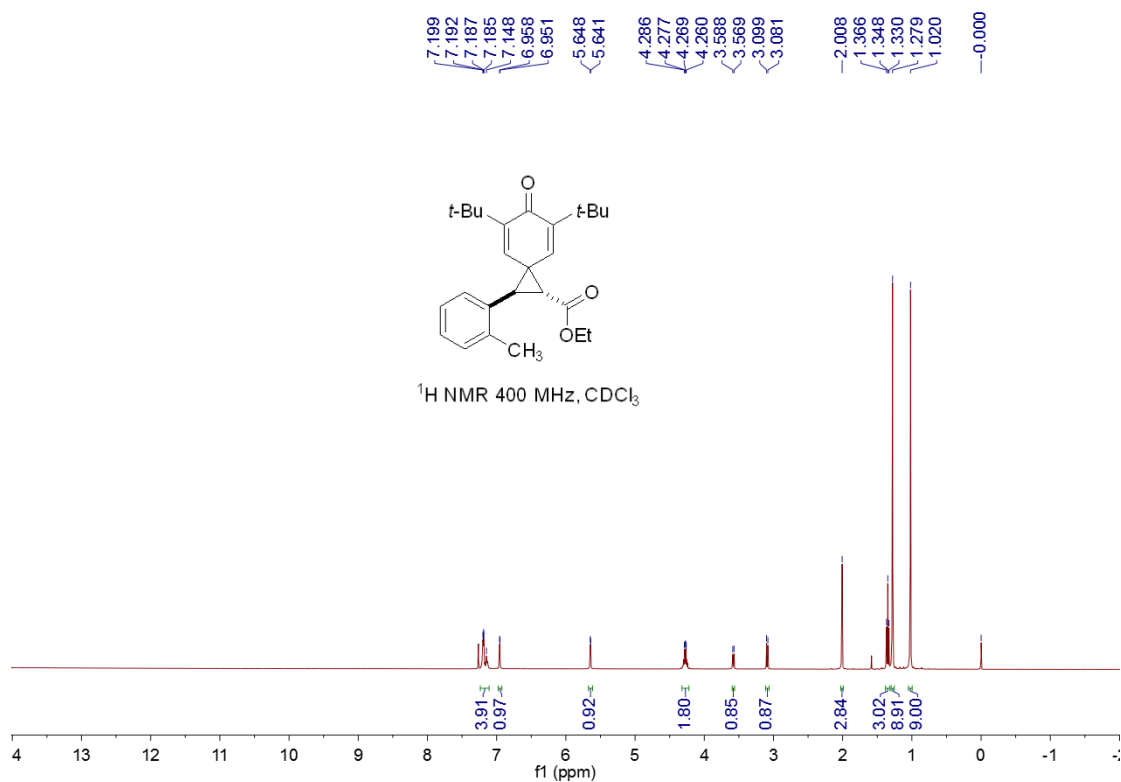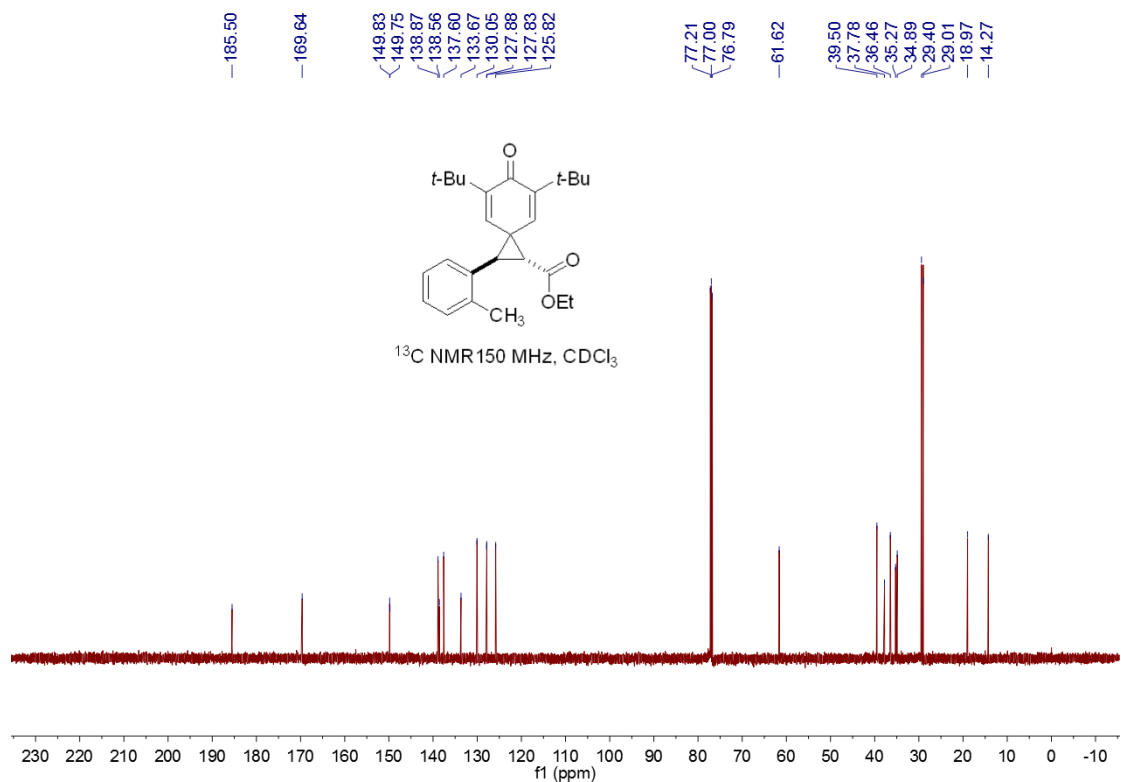

NMR copies of compound **6c**:

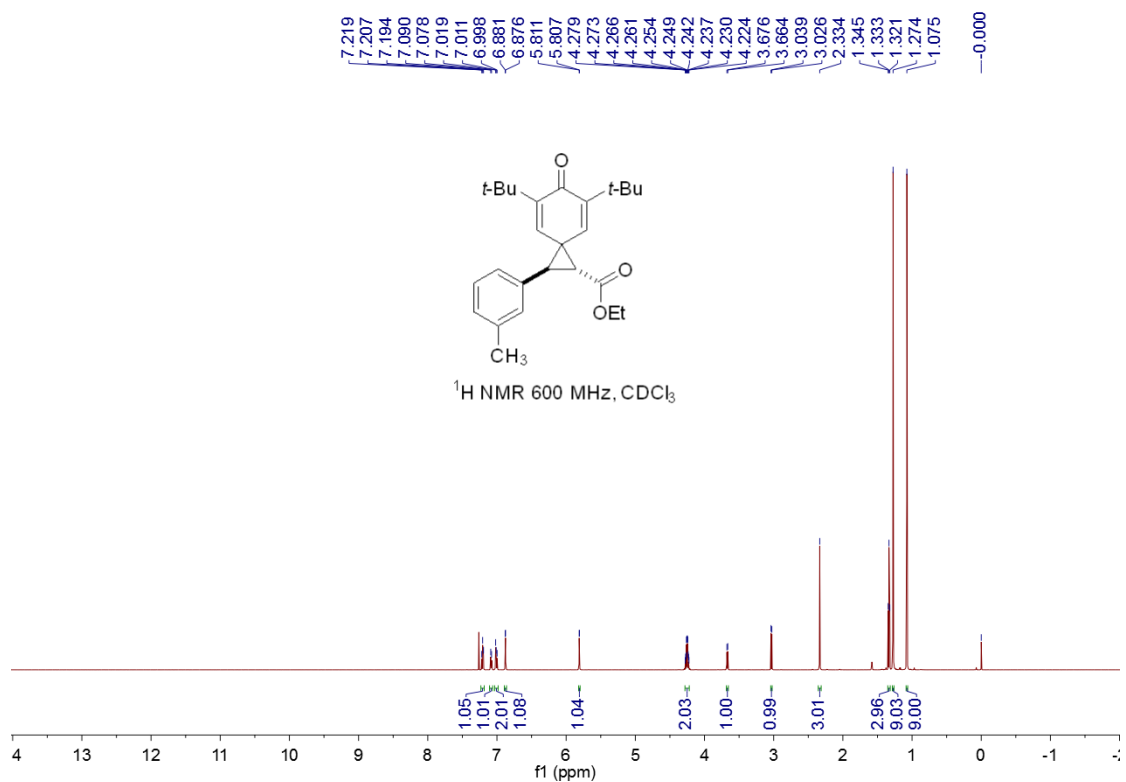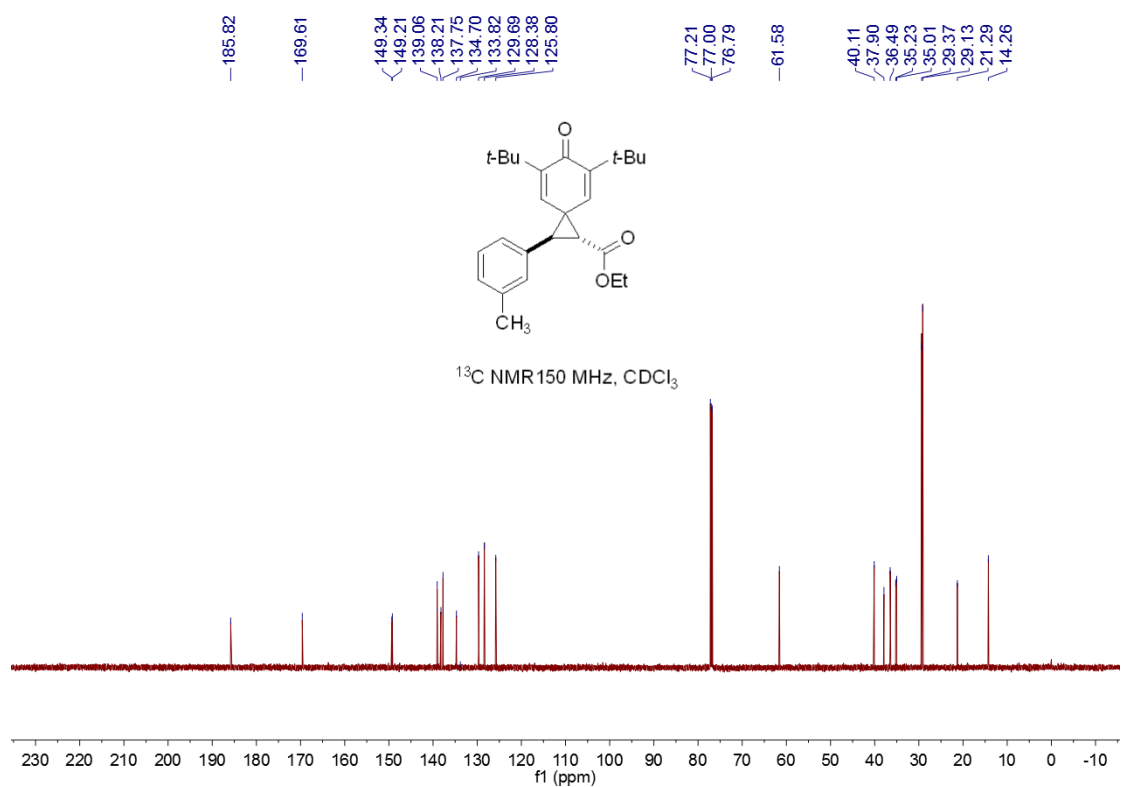



NMR copies of compound **6d**:

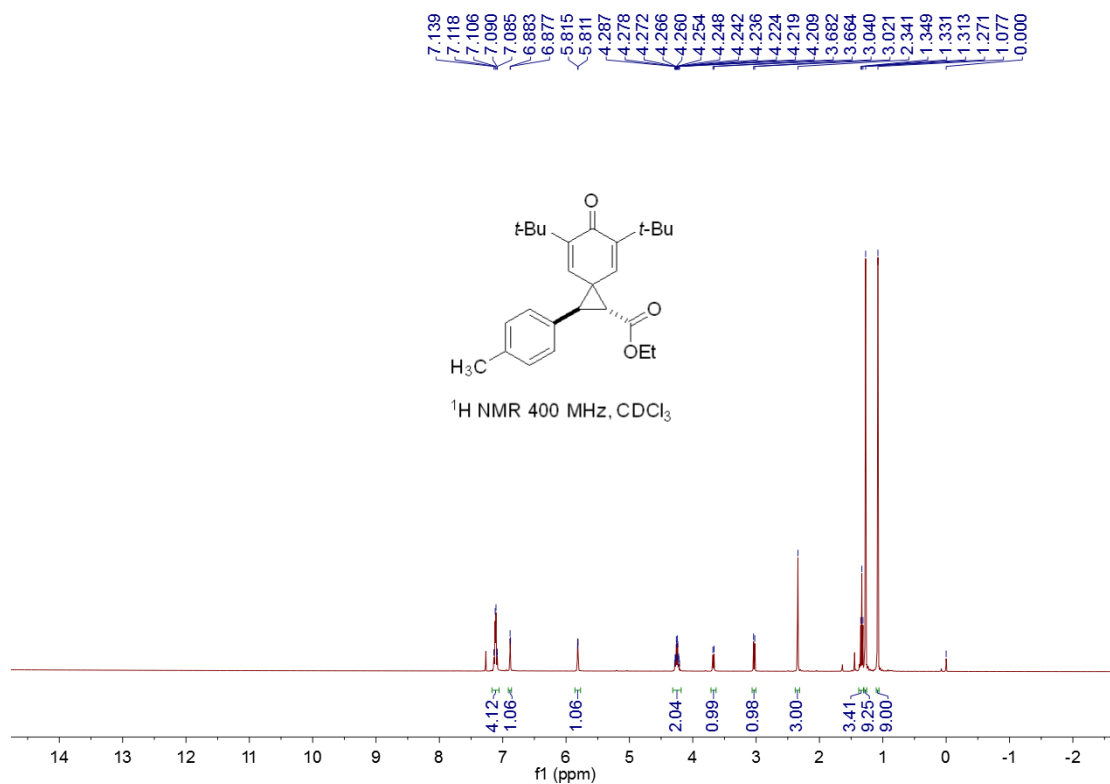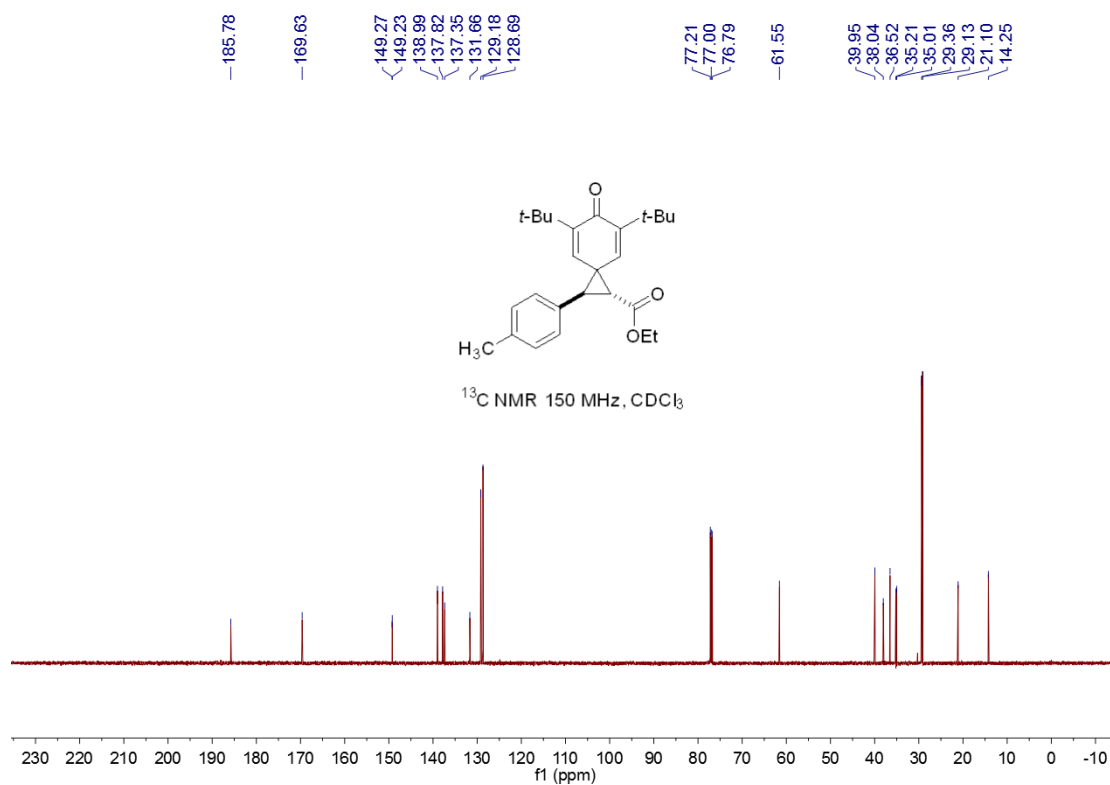

NMR copies of compound **6e**:

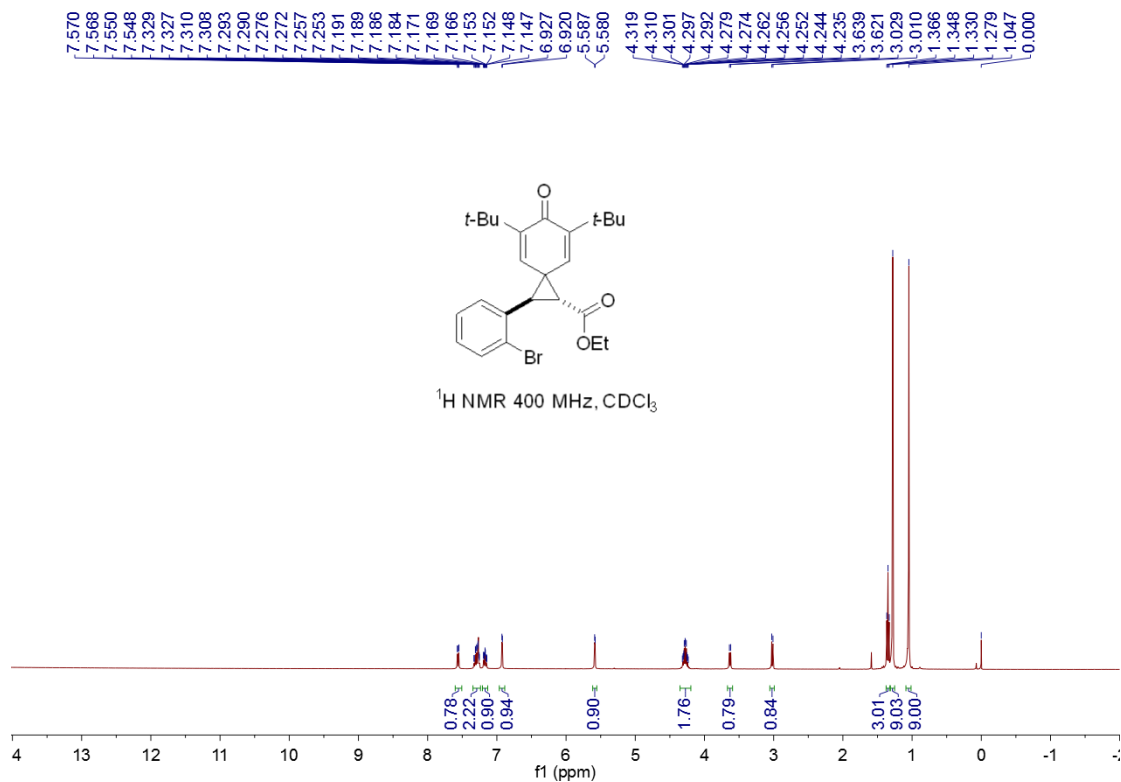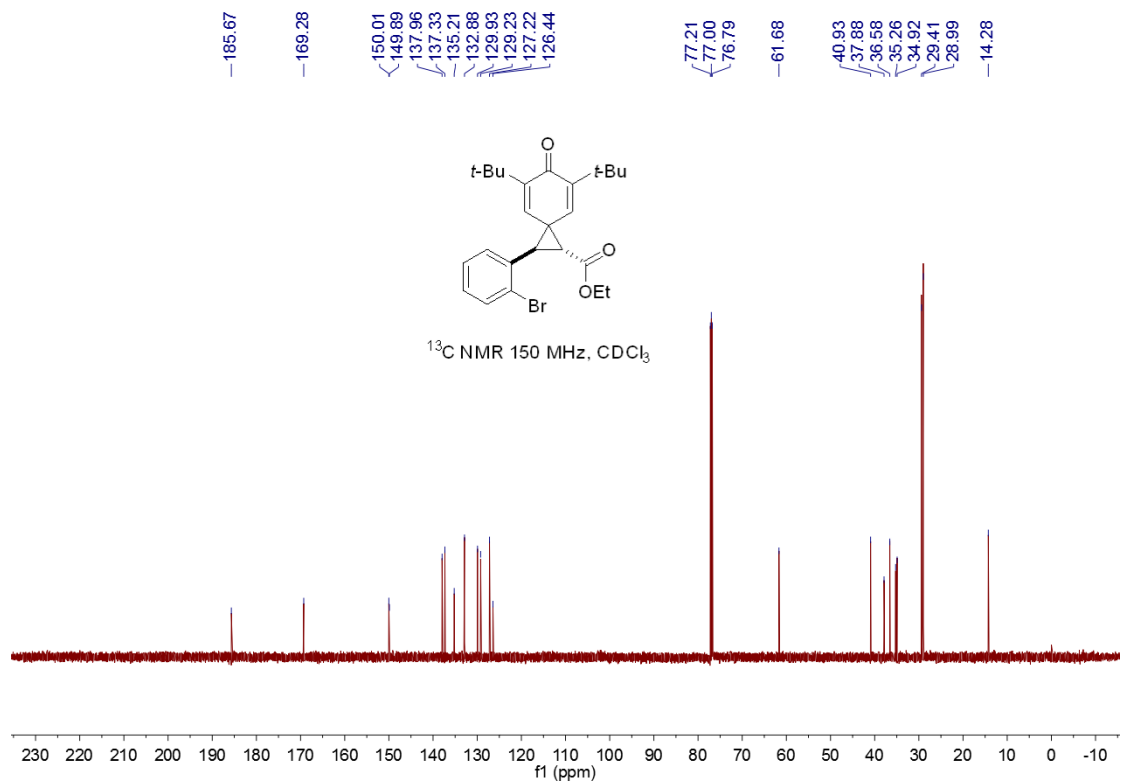

NMR copies of compound **6f**:

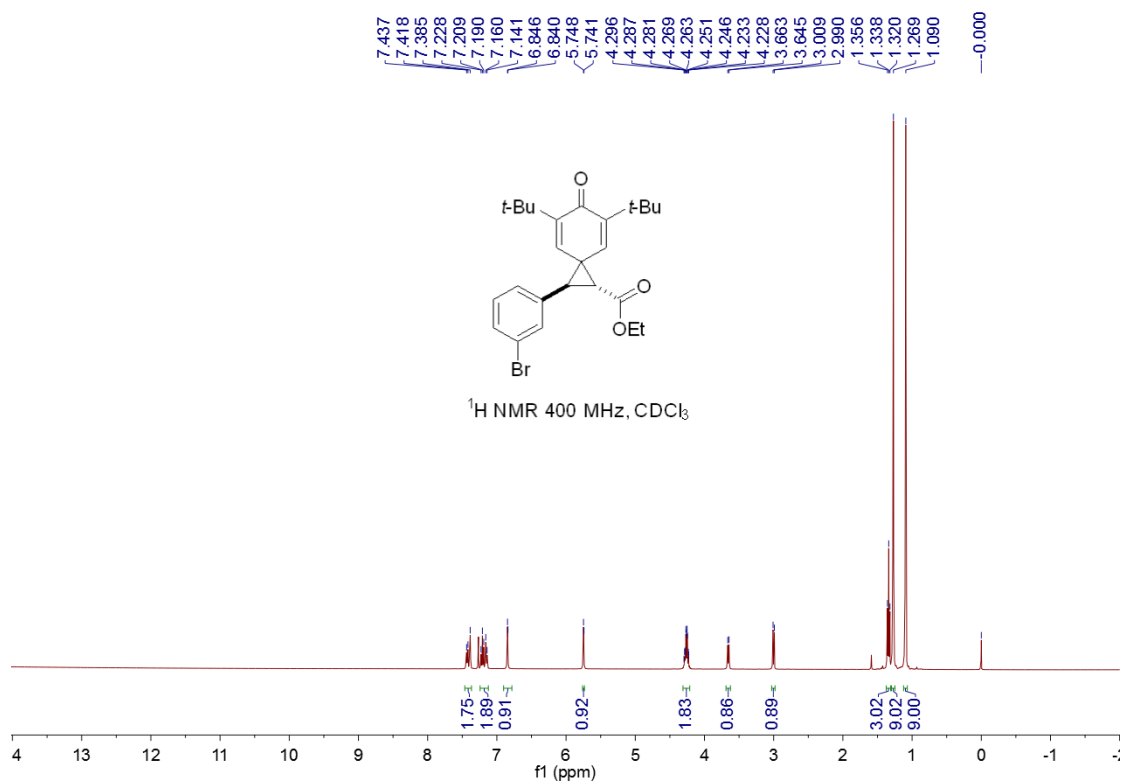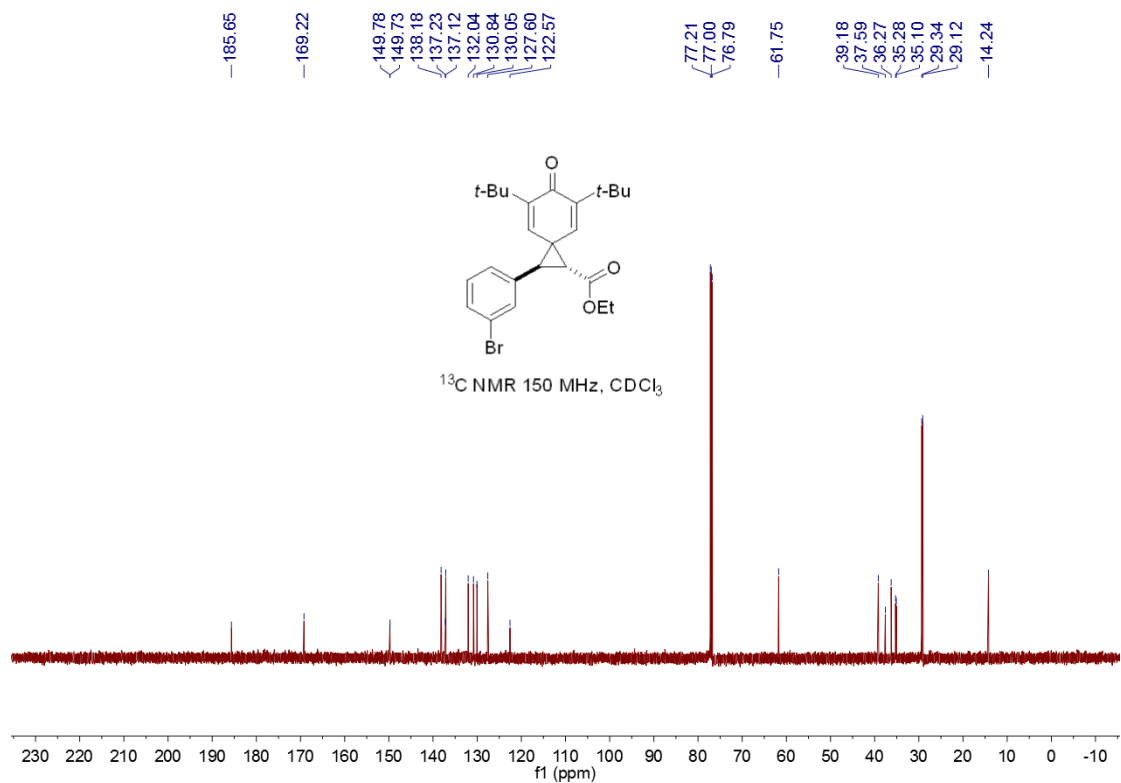

NMR copies of compound **6g**:

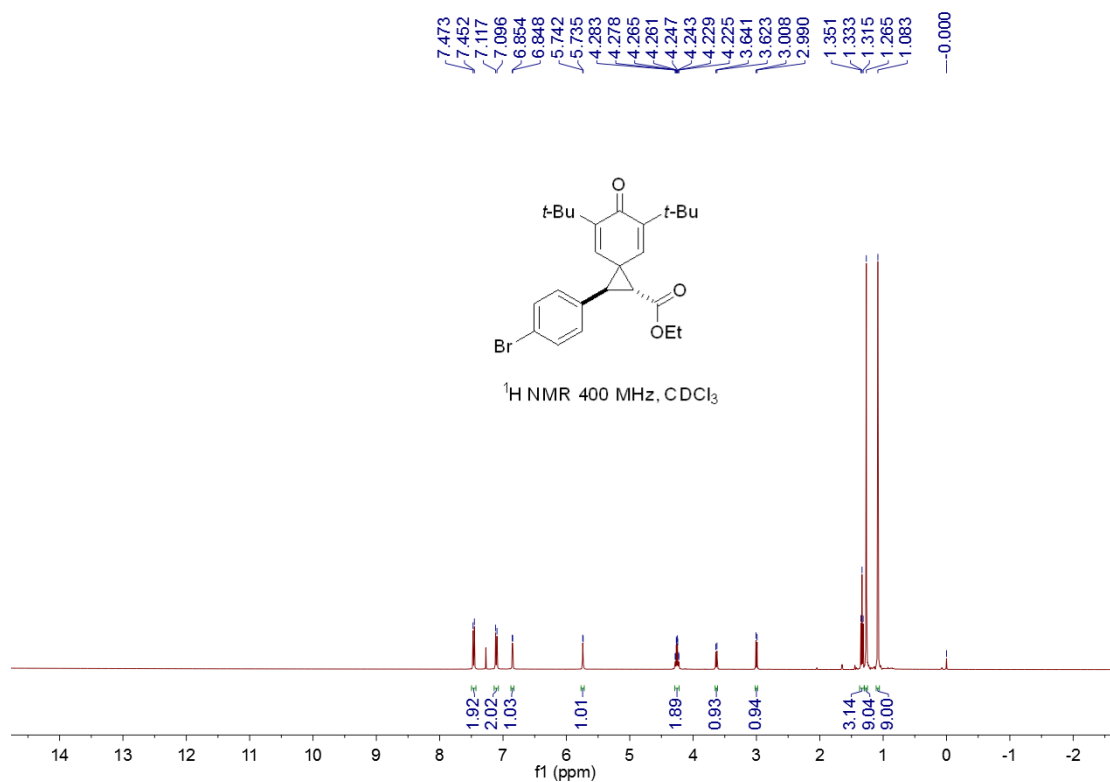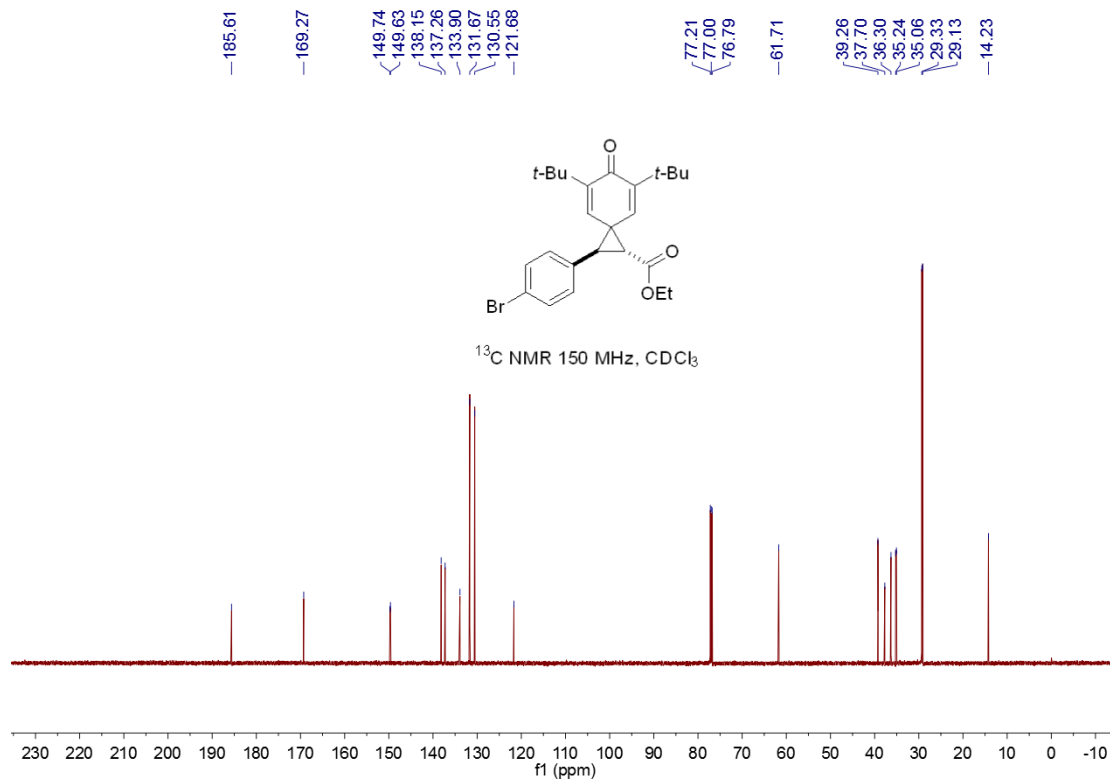

NMR copies of compound **6h**:

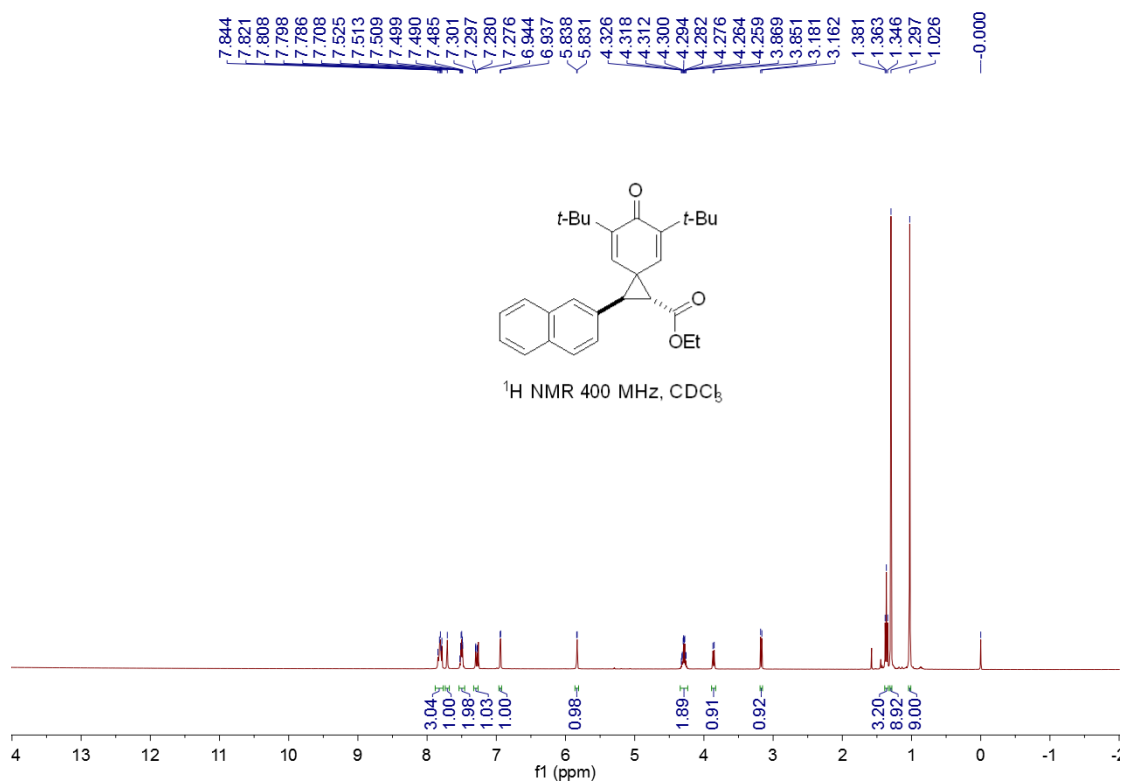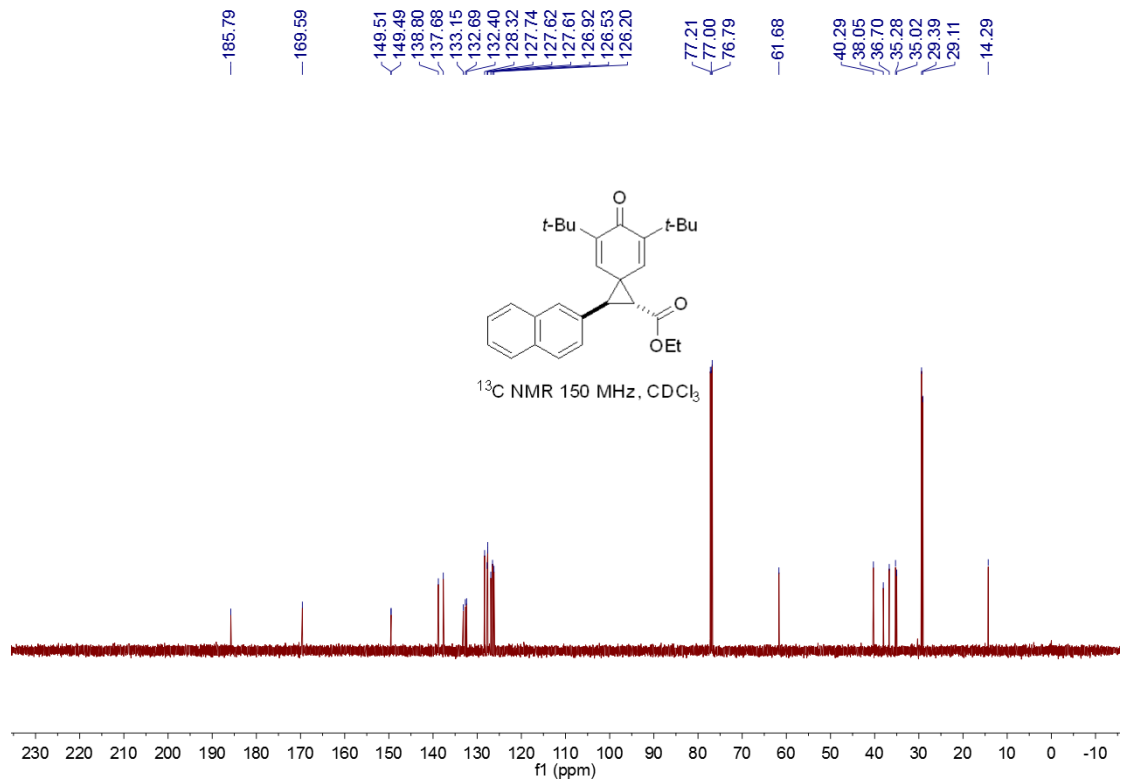

NMR copies of compound **6i**:

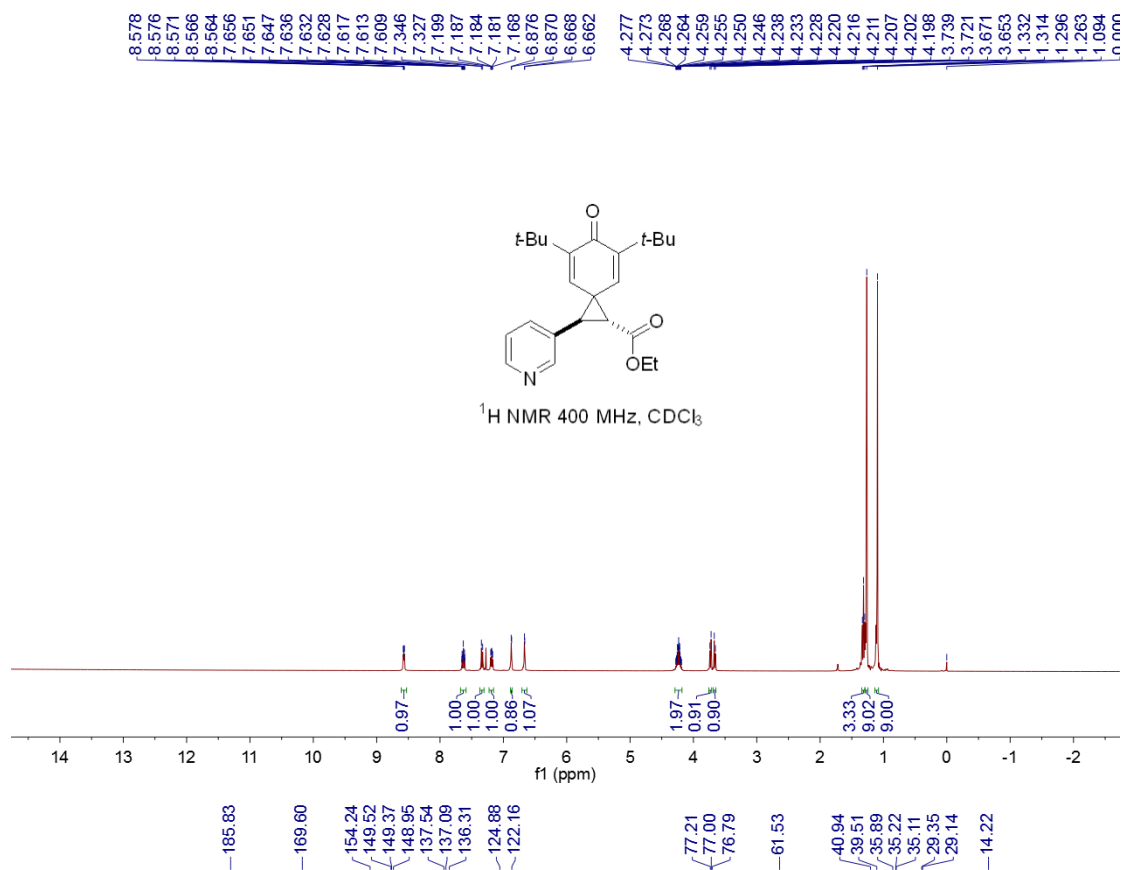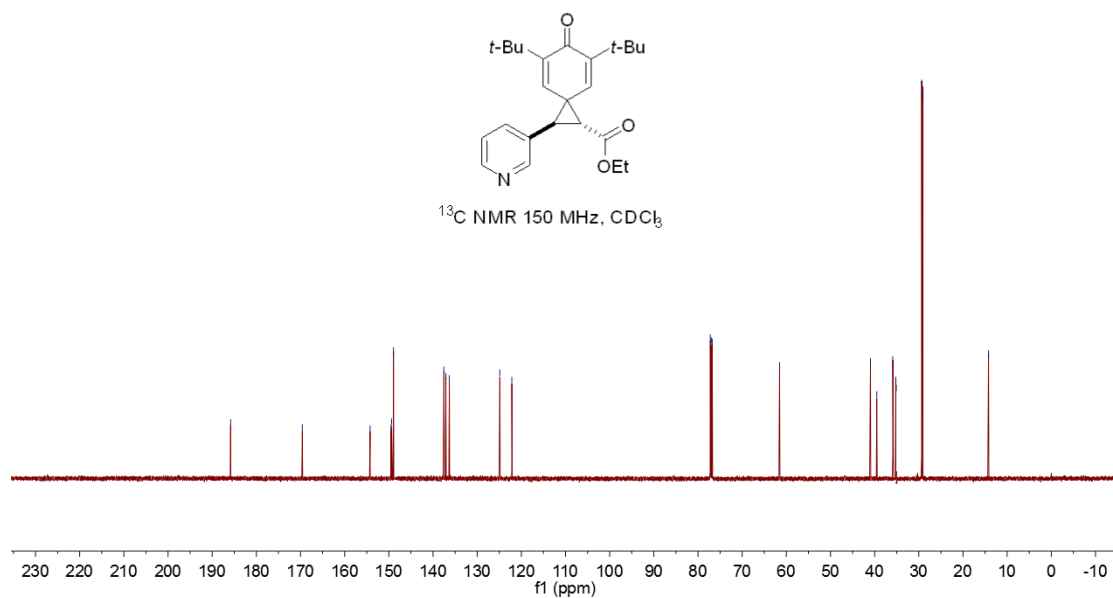

NMR copies of compound **6j**:

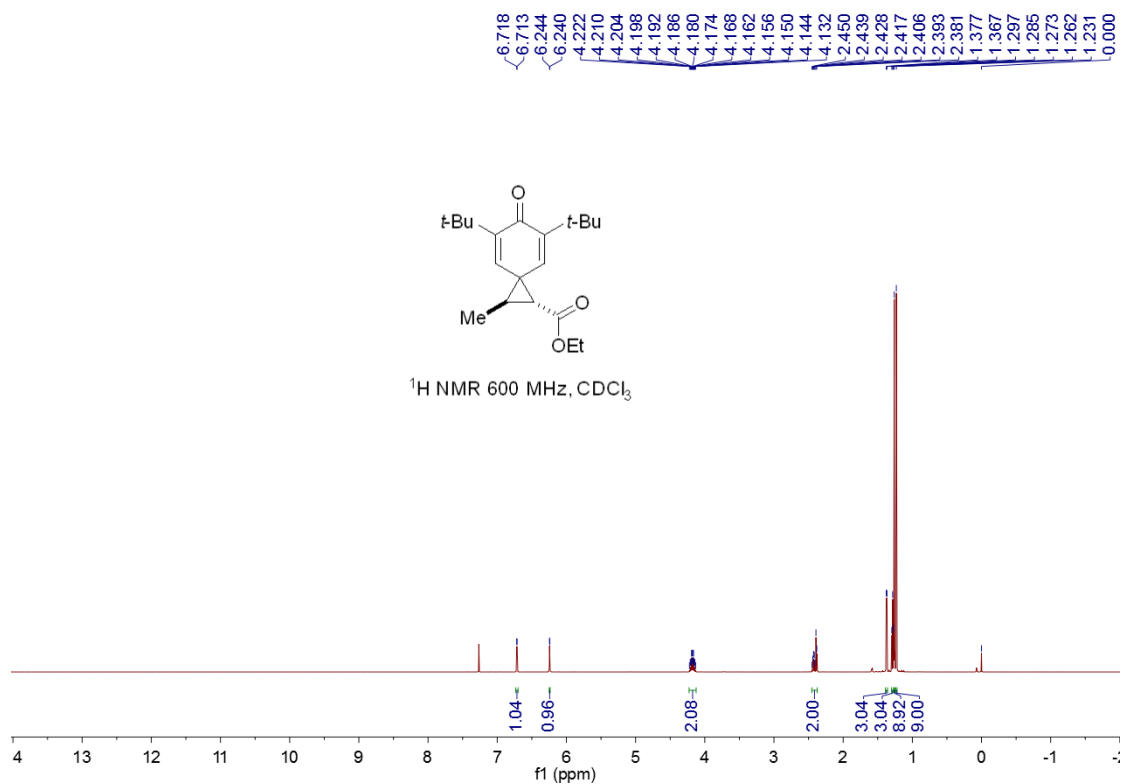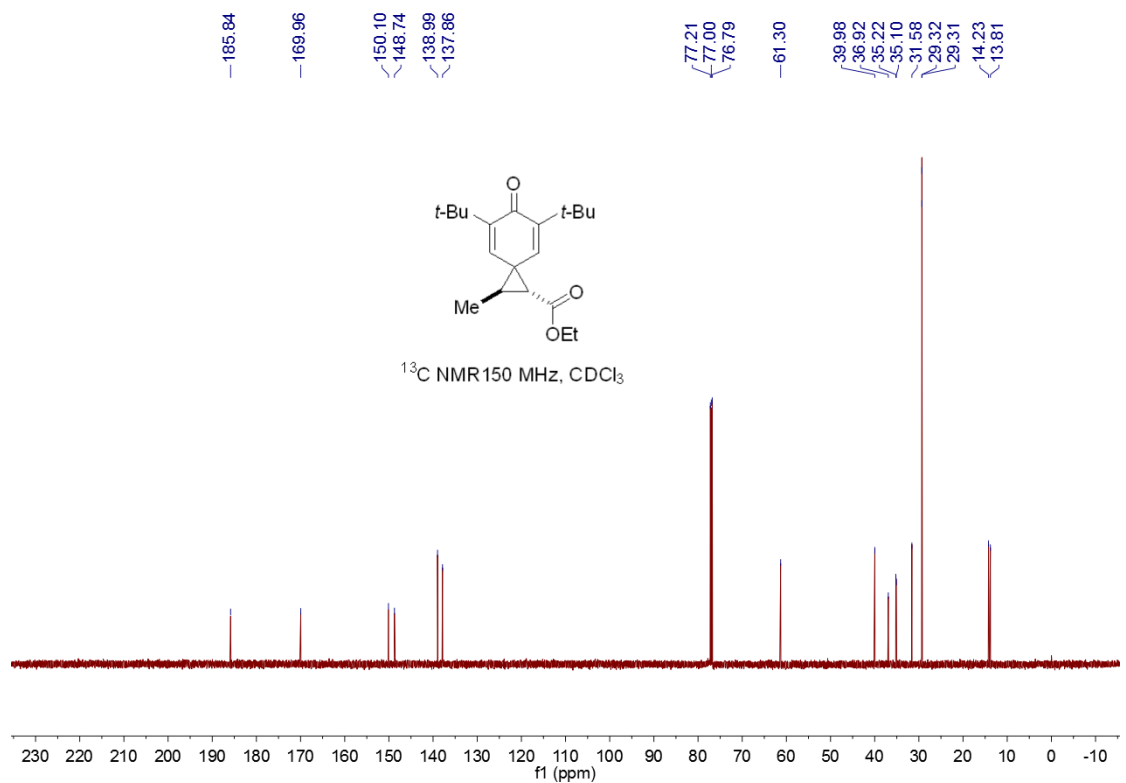

NMR copies of compound **6k**:

7.337  
7.326  
7.313  
7.294  
7.282  
7.264  
7.218  
7.206  
6.874  
6.869  
5.770  
5.765  
4.299  
4.287  
4.281  
4.275  
4.269  
4.257  
4.245  
4.239  
4.233  
4.227  
4.215  
4.215  
3.769  
3.757  
3.119  
3.106  
3.097  
3.086  
3.075  
3.075  
2.998  
2.987  
2.975  
2.964  
2.953  
2.942  
1.330  
1.319  
1.139  
1.127  
1.086  
1.075  
0.930  
0.919  
0.805  
0.793  
0.000

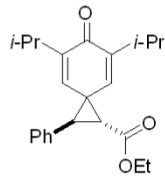

<sup>1</sup>H NMR 600 MHz, CDCl<sub>3</sub>

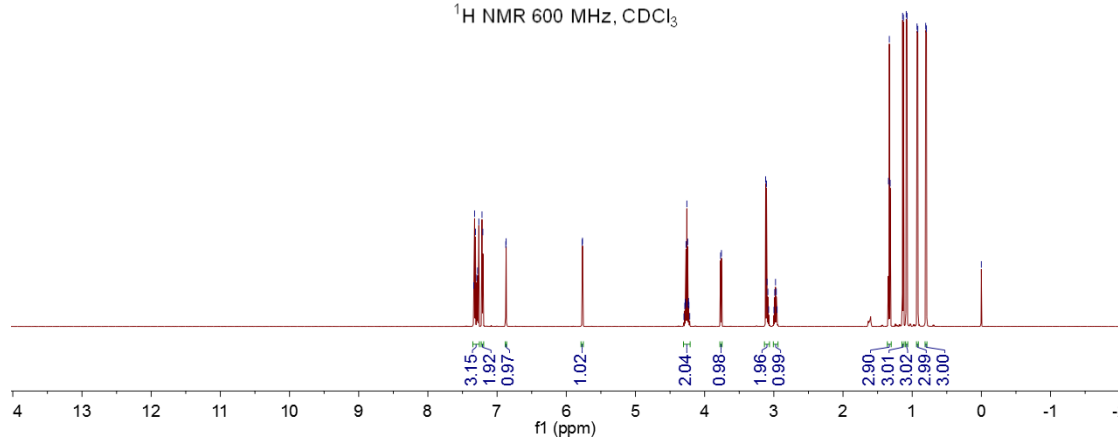

184.55  
169.44  
147.62  
147.61  
138.93  
137.73  
134.69  
128.85  
128.55  
127.73  
77.21  
77.00  
76.79  
61.64  
40.25  
38.09  
36.46  
26.86  
26.56  
21.98  
21.92  
21.76  
21.65  
14.25

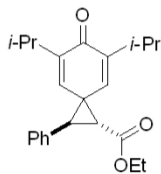

<sup>13</sup>C NMR 150 MHz, CDCl<sub>3</sub>

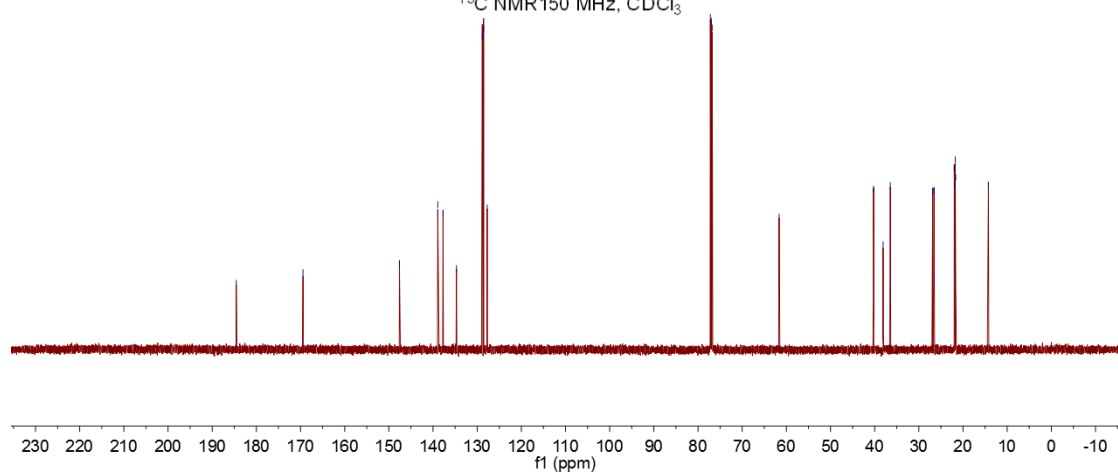



NMR copies of compound **6l**:

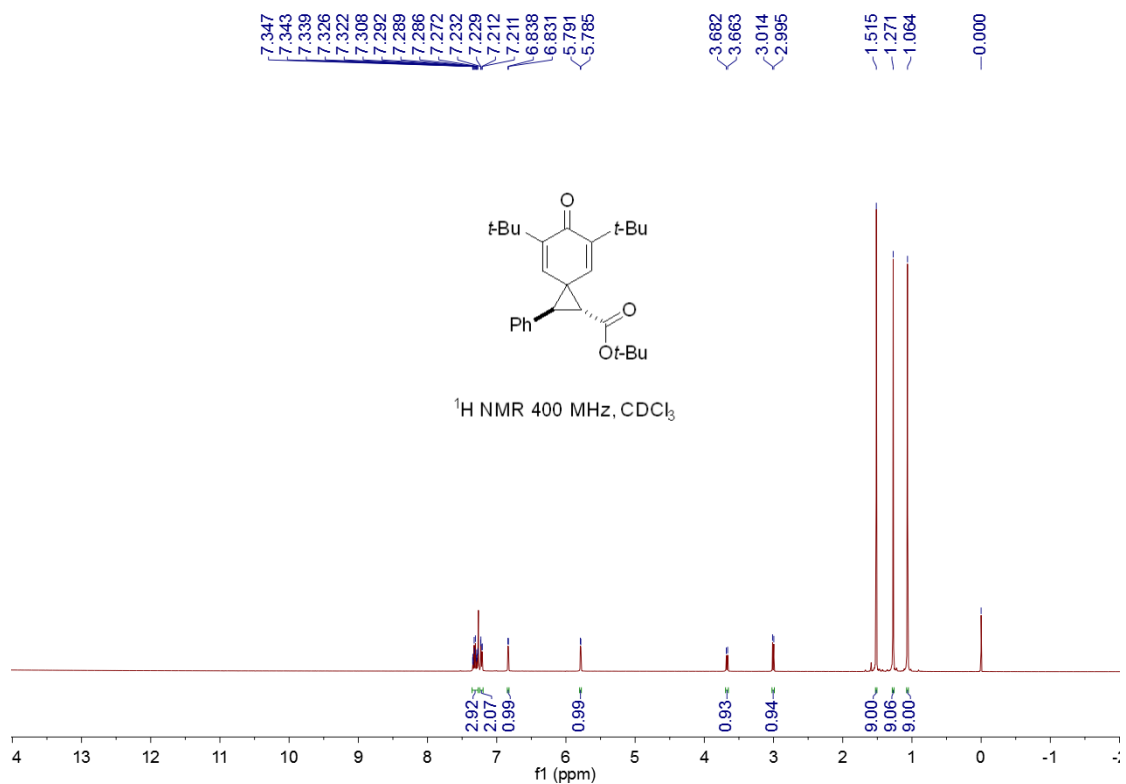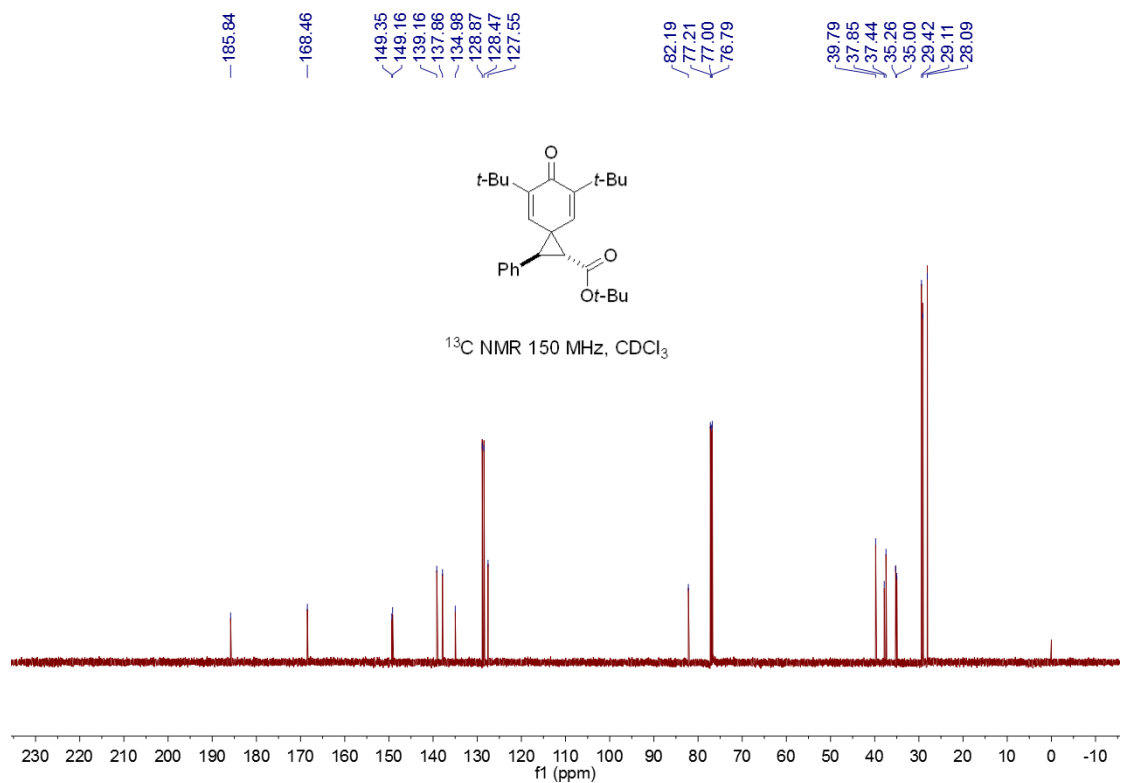

NMR copies of compound **6m**:

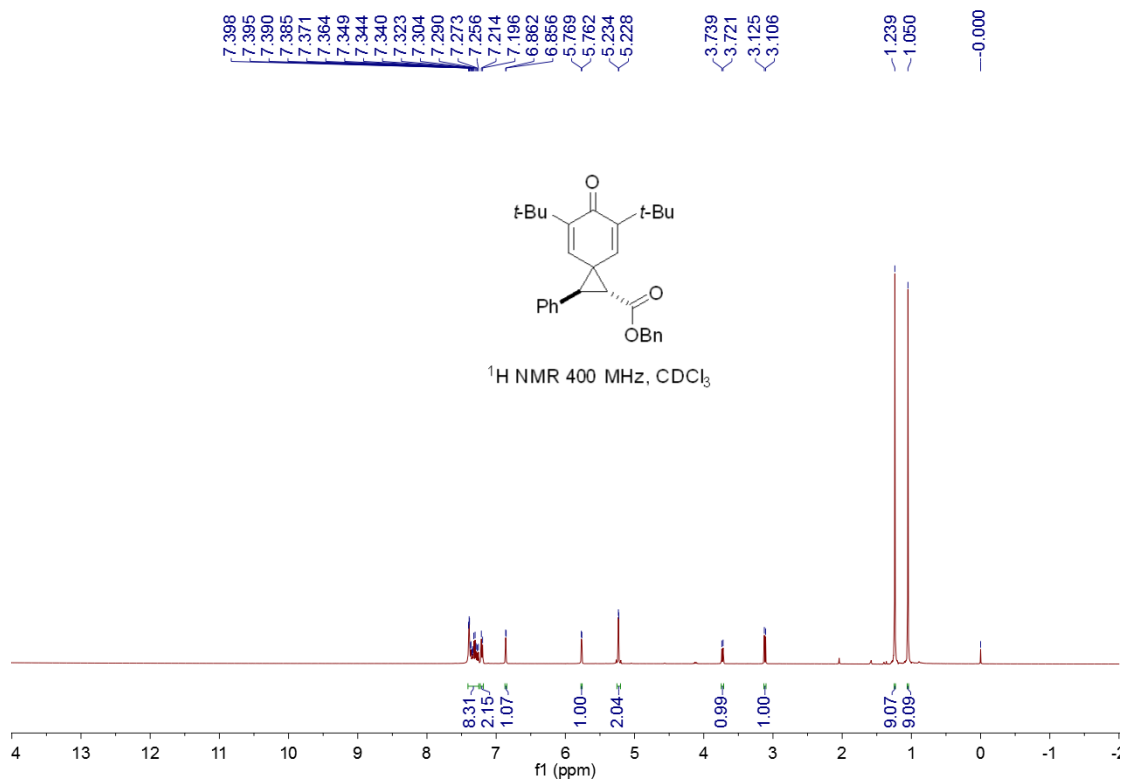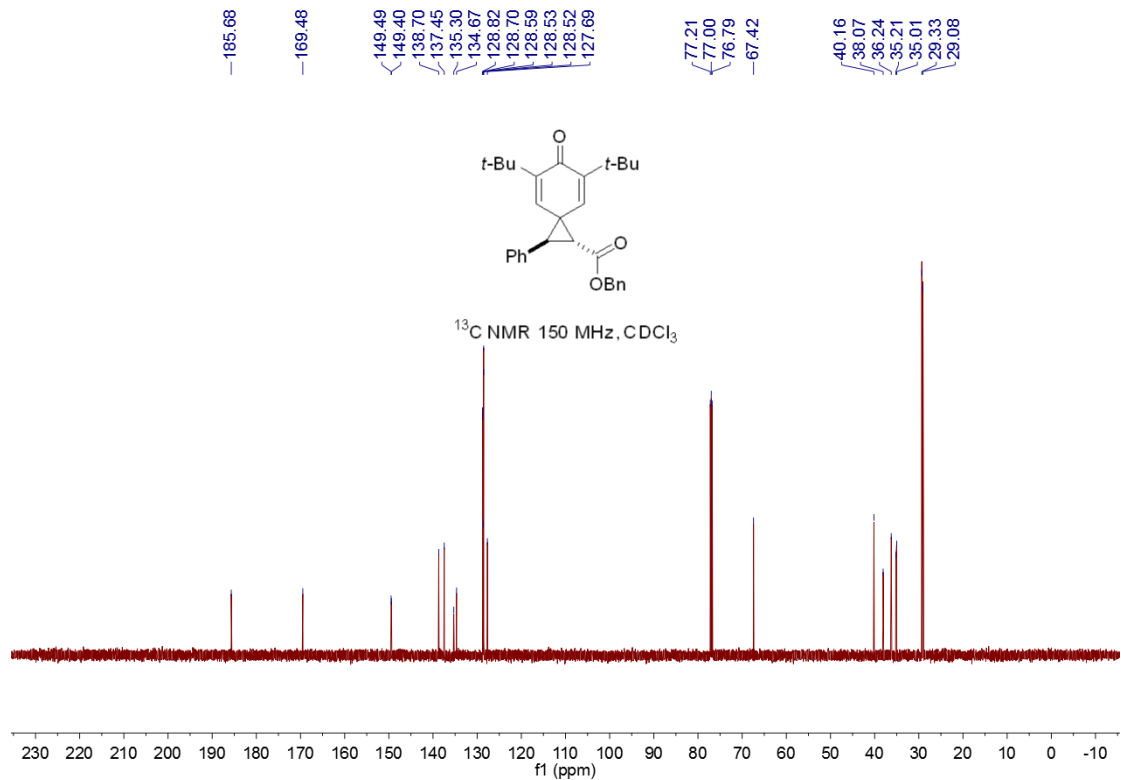

NMR copies of compound **6n**:

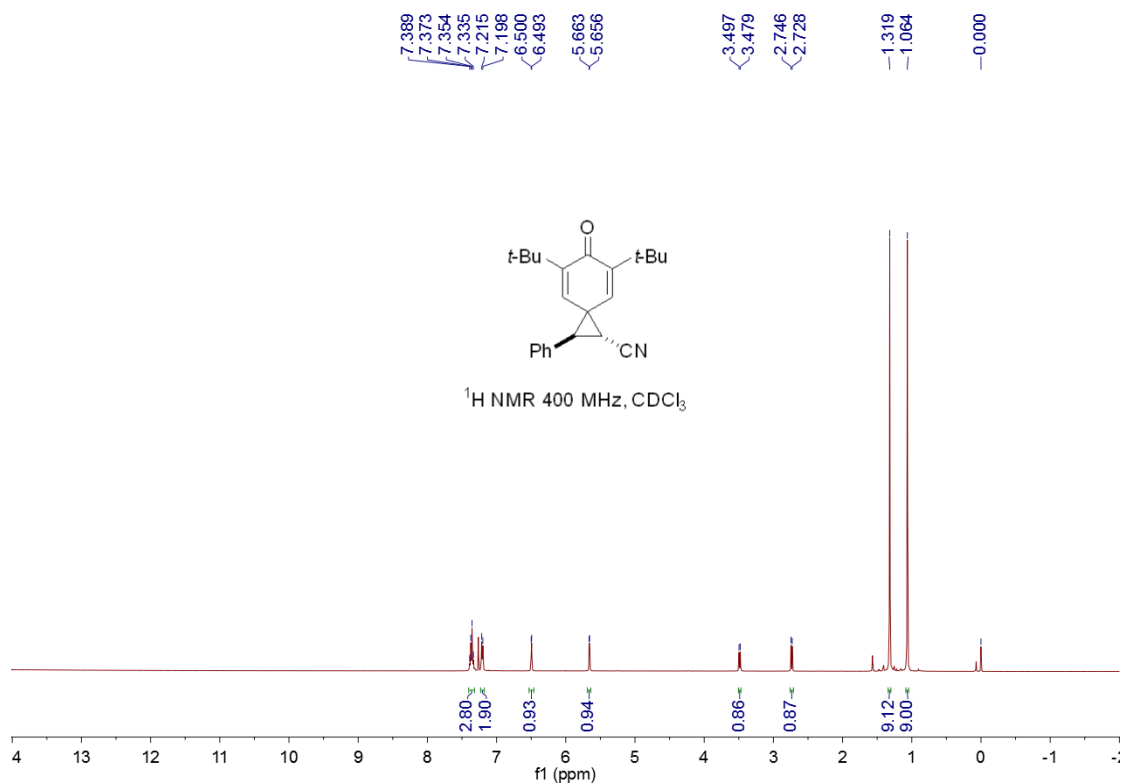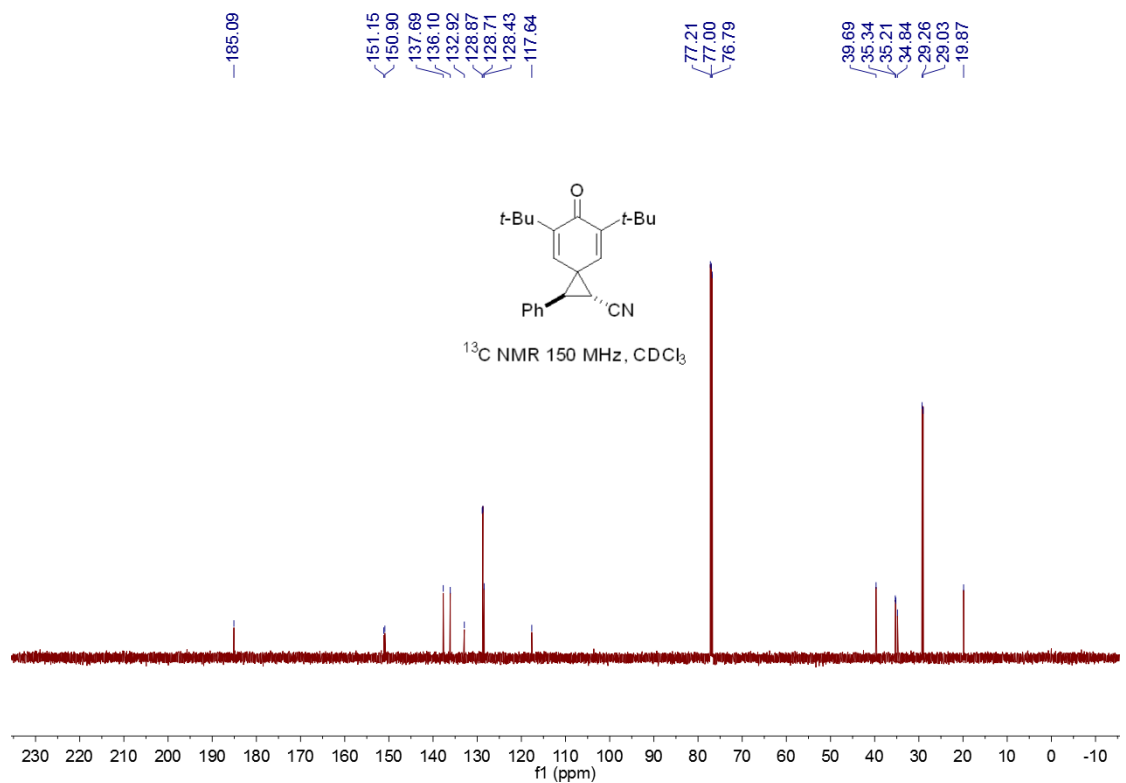

Supplement: d0ob00778a1.pdf [file d0ob00778a1.pdf]
